# Supplementary material
Source: publisher figshare collection journal article supplement (https://gsapubs.figshare.com/ndownloader/files/23305802)
Supplement: Supplementary file 2 [file 23305802]

Archive with 2 entries (2 files):
- 2017332.xlsx
- Analytical Methods for DR Tables 3-5 .pdf
