# Supplementary material
Source: publisher figshare collection journal article supplement (https://gsapubs.figshare.com/ndownloader/files/23305802)
Supplement: Supplementary file 2 [file 23305802 › 2017332.xlsx]

## Sheet: Table DR1
Dusel-Bacon, C., Holm-Denoma, C.S., Jones, J.V., III, Aleinikoff, J.N., and Mortensen, J.K., 2017, Detrital zircon geochronology of quartzose metasedimentary rocks from parautochthonous North America, east-central Alaska: Lithosphere, doi:10.1130/L672.1.
GSA Data Repository Item 2017332
GSA Data Repository Table DR1. Descriptions and locations of rock samples from which detrital zircon was analyzed in the Alaska Range and Yukon-Tanana Upland, east-central Alaska.
Sample	Unit	Sample description	Latitude (NAD27 Zone 6)	Longitude (NAD27 Zone 6)	Eleva- tion (m)	1:63,360 quadragle
05ADb34	Healy schist	Quartzite with sparse round to ovoid clasts of polycrystalline quartz, K-feldspar, and one observed plagioclase-bearing rock fragment within a fine-grained matrix of quartz and sericite. Zircon, apatite, and epidote are accessory minerals.	63° 49' 18.5"	148° 50' 35.8"	1026	Healy D-4
05ADb35	"	Polydeformed quartzite containing clasts of oval quartz grains within a matrix of fine-grained quartz with minor sericite. Zircon, carbonate, Fe-oxide, and one pyrite cube are accessory minerals. Steep wavy foliation is cut by a later near horizontal spaced cleavage.	63° 47' 11.9"	148° 51' 24.9"	1398	Healy D-4
05ADb36	"	Polydeformed quartzite composed of fine-grained quartz and very minor sericite containing sparse, < 1 mm-long quartz clasts and smaller grains of probable altered plagioclase. Zircon and apatite are accessory minerals.	63° 53' 7.9"	148° 23' 24.1"	1228	Healy D-3
04ADb01B	Keevy Peak Fm.	Light grey quartzite composed of grains of subangular, strained monocrystalline quartz or fine-grained polycrystalline quartz, in addition to two shale fragments with kinked cleavage within a finer grained matrix of cryptocrystalline quartz and local concentrations of carbonaceous material. Zircon and apatite are accessory minerals.	63° 55' 26.3"	147° 57' 6.1"	1588	Healy D-2
03ADb14	Sheep Creek Member of Totat- lanika Schist	Quartz-eye semischist within a matrix of thin trains of sericite and comminuted quartz that define the foliation. Mylonitization is evident from strained quartz grains and comminuted grain boundaries between many quartz crystals. Zircon and apatite are accessory minerals.	63° 56' 53.7"	147° 20' 6.0"	1032	Healy D-1
98ADb79A	"	Quartz- and feldspar-eye semischist with clasts made up of quartz and minor feldspar in a matrix of discontinuous wisps of sericite and fine-grained quartzo-feldspathic material. Tourmaline, zircon, and apatite are accessory minerals	63° 57' 12"	147° 34' 27"	1463	Healy D-2
96ADb25A	Butte assem- blage	Mylonitic quartz- and K-feldspar-eye semischist within a fine-grained matrix of quartz and albite(?), sericite, and minor trains of opaque minerals. Mylonitization indicated by undulose extinction of some quartz grains and eye- shape of clasts. Zircon, apatite, and opaque minerals occur as accessories.	64°50' 52"	145°15'18"	1006	Big Delta D-3
97ADb43A	Butte assem- blage	Quartz-eye mylonite with sparse grains of fractured, eye- shaped, K-feldspar grains. Some quartz grains have wavy undulose extinction. Matrix composed of fine grainedquartz, sericite, and minor patches of Fe?- carbonate. Zircon, apatite, and iron oxide are accessory minerals.	63° 51' 56"	145°45'10"	881	Big Delta D-4

## Sheet: Table DR2
Dusel-Bacon, C., Holm-Denoma, C.S., Jones, J.V., III, Aleinikoff, J.N., and Mortensen, J.K., 2017, Detrital zircon geochronology of quartzose metasedimentary rocks from parautochthonous North America, east-central Alaska: Lithosphere, doi:10.1130/L672.1.
GSA Data Repository Item 2017332
GSA Data Repository Table DR2. Whole-rock geochemical analyses of quartz semi-schist from east-central Alaska.
Sample	98ADb79A*	98ADb79B	96ADb9A	96ADb25A*	98ADb69	98ADb68B
Unit	Sheep Creek Member	Sheep Creek Member	Sheep Creek Member	Butte assemblage	Butte assemblage	Butte assemblage
XRF (wt %, normalized to 100%)
SiO2	79.8958	80.8525	76.9393	82.1496	86.0067	78.6023
Al2O3	10.4081	9.45343	8.16797	10.8664	7.86714	9.51232
TiO2	0.437441	0.368472	0.268591	0.378921	0.15955	0.327803
FeO*	2.80063	2.33165	1.74283	1.49162	1.37575	2.44746
MnO	0.0965387	0.0322162	0.16837	0.0120292	0.00501731	0.098542
CaO	0.281571	1.84236	8.07777	0.260633	0.0702423	3.68024
MgO	1.34752	0.875877	0.771698	0.521267	1.32457	1.13625
K2O	2.1319	1.68128	1.37302	2.69655	0.792735	1.46807
Na2O	2.53414	2.50682	2.44538	1.5638	2.3481	2.67471
P2O5	0.0663703	0.0553715	0.0450992	0.0591437	0.0501731	0.0522876
LOI (%)	1.62059	2.55191	6.91634	1.68738	1.17741	3.92157
XRF (ppm)
Ni	17	16	8	15	11	16
Cr	32	27	20	40	10	35
V	33	41	17	37	18	38
Zr	289	268	248	272	135	173
Ga	13	11	8	15	9	13
Cu	12	10	8	11	6	8
Zn	46	37	20	13	9	36
ICP-MS (ppm)
La	28.5027	26.7971	21.3613	36.6407	19.4482	23.6206
Ce	56.9579	53.1794	42.0647	71.3669	38.2523	47.0145
Pr	6.04709	5.58583	4.48793	7.21998	3.70472	4.91607
Nd	23.116	21.1231	17.3991	26.3999	13.6419	18.5513
Sm	4.69471	4.25472	3.81363	4.95454	2.59215	3.70144
Eu	0.925617	0.926429	0.806055	0.795628	0.496166	0.785879
Gd	3.55943	3.15669	2.98274	3.51775	1.82728	2.93868
Tb	0.532431	0.470971	0.459682	0.508302	0.308375	0.441969
Dy	2.83424	2.53812	2.55444	2.88128	1.66478	2.2852
Ho	0.561221	0.500499	0.487665	0.559348	0.313924	0.445015
Er	1.49666	1.31597	1.23679	1.55937	0.826014	1.16754
Tm	0.228359	0.198644	0.179471	0.237833	0.122708	0.172718
Yb	1.46408	1.25901	1.1043	1.53992	0.776968	1.08299
Lu	0.234033	0.204077	0.175769	0.248208	0.122034	0.173877
Ba	490.31	371.756	279.319	682.027	155.664	328.197
Th	12.4676	11.3339	8.13365	17.0703	8.17436	9.48421
Nb	9.51167	7.65014	6.15945	8.70456	3.70283	6.53308
Y	15.575	14.2743	14.7057	15.6298	9.15089	12.5147
Hf	7.37872	6.84026	5.9481	7.39573	3.46219	4.22524
Ta	0.643994	0.543094	0.40749	0.771773	0.298729	0.516545
U	2.03173	1.3864	1.15295	2.09821	1.07036	1.24798
Pb	18.0483	17.1579	10.6194	3.50724	4.16623	16.2929
Rb	74.1307	58.9402	49.5442	102.458	30.0706	48.5823
Cs	1.80575	1.5404	1.17629	2.28226	0.734366	1.07641
Sr	38.3052	47.4929	145.76	39.0394	55.7169	207.738
Sc	7.49843	6.01227	4.07948	7.26282	3.55513	7.24496
* Whole-rock analysis is from same sample from which detrital zircons were separated and analyzed.
Note: Latitude and longitude (NAD27 Zone 6) for samples for which detrital zircons were analyzed are given in Table 1. For other samples: 98ADb79B, same location as sample 98ADb79A; 96ADb9A, 63°57'17", 147°34'21"; 98ADb69, 64°51'58", 145°45'00"; 98ADb68B, 64°50'50", 145°43'00".

## Sheet: Table DR3
Dusel-Bacon, C., Holm-Denoma, C.S., Jones, J.V., III, Aleinikoff, J.N., and Mortensen, J.K., 2017, Detrital zircon geochronology of quartzose metasedimentary rocks from parautochthonous North America, east-central Alaska: Lithosphere, doi:10.1130/L672.1.
GSA Data Repository Item 2017332
Table DR3
Analysis	Isotopic Ratios							Isotopic Ages (Ma)						Discordance	Background corrected mean counts per second								Th/U
number	207Pb/206Pb	1 sigma absolute	207Pb/235Pb	1 sigma absolute	206Pb/238Pb	1 sigma absolute	Rho	207Pb/206Pb	1 sigma	207Pb/235Pb	1 sigma	206Pb/238Pb	1 sigma	(%)	202	204	206	207	208	232	235	238
05ADb34
1	0.18363	0.0028	12.4511	0.97109	0.50676	0.00766	0.193809	2685.9	25.02	2639	73.3	2642.8	32.77	1.60468	49	8	6383	1155	1859	6274	31	3478	0.184093
2	0.17635	0.00184	14.158	0.71679	0.53878	0.00519	0.190268	2618.9	17.28	2760.3	48.02	2778.3	21.76	-6.08652	0	0	22853	3972	6227	9948	96	11716	0.399276
3	0.18363	0.00118	13.5645	0.30707	0.52698	0.00246	0.206209	2685.9	10.54	2719.8	21.41	2728.7	10.38	-1.59351	39	13	67601	12233	14755	25998	309	35439	0.470536
4	0.07538	0.00075	1.85479	0.03868	0.18226	0.00094	0.247312	1078.7	19.94	1065.1	13.76	1079.3	5.1	-0.0556225	16	0	33493	2488	4622	21578	460	50775	0.115303
5	0.12213	0.0026	6.0595	0.49929	0.36166	0.00594	0.199329	1987.6	37.36	1984.4	71.81	1990	28.14	-0.120749	0	0	4318	519	1533	3349	29	3299	0.154972
6	0.07407	0.00075	1.86041	0.0394	0.1828	0.00094	0.242809	1043.4	20.27	1067.1	13.99	1082.3	5.15	-3.7282	0	4	24017	1752	269	934	323	36325	1.8758
7	0.11708	0.00196	6.26892	0.38926	0.36981	0.00468	0.203807	1912.2	29.74	2014.1	54.38	2028.5	22.02	-6.082	15	8	12823	1478	2909	6822	81	9588	0.216652
8	0.07236	0.00132	1.6245	0.06251	0.16707	0.00158	0.24577	996	36.72	979.7	24.19	996	8.74	0	12	10	15009	1069	967	4095	226	24845	0.26105
9	0.07782	0.00155	2.27261	0.10882	0.20679	0.0023	0.232281	1142.2	39.07	1203.8	33.76	1211.7	12.27	-6.08475	4	17	8385	642	1153	4295	97	11216	0.149476
10	0.16999	0.00324	11.1263	1.00745	0.49582	0.0091	0.202695	2557.5	31.53	2533.8	84.36	2595.8	39.22	-1.49756	7	0	7601	1272	1593	2798	39	4241	0.45461
11	0.0782	0.00103	2.14321	0.06531	0.19953	0.00143	0.235187	1151.9	25.96	1162.9	21.1	1172.8	7.7	-1.81439	0	0	22067	1698	4026	17315	272	30605	0.0980653
12	0.11003	0.00196	5.76931	0.37106	0.35428	0.00463	0.203196	1799.9	32.15	1941.8	55.66	1955	22.02	-8.61715	0	9	16942	1835	1143	2450	109	13235	0.74898
13	0.0759	0.0008	1.80562	0.03914	0.17577	0.00095	0.249336	1092.5	20.9	1047.5	14.16	1043.8	5.18	4.45767	12	28	22166	1656	738	3046	316	34910	0.543664
14	0.17709	0.00135	12.0901	0.36226	0.49823	0.00303	0.202965	2625.8	12.58	2611.4	28.1	2606.2	13.03	0.746439	39	5	29076	5068	3583	10196	144	16157	0.497058
15	0.07848	0.00095	1.91292	0.05065	0.17736	0.00113	0.240625	1159.1	23.77	1085.6	17.66	1052.5	6.2	9.19679	16	11	23695	1830	1180	5747	329	36998	0.318427
16	0.0809	0.00067	2.19868	0.03794	0.19829	0.00084	0.245495	1219.1	16.12	1180.6	12.04	1166.1	4.51	4.34747	9	0	39189	3119	2387	22343	489	54741	0.139596
17	0.08253	0.00101	2.38752	0.06955	0.21235	0.00146	0.236021	1258.2	23.56	1238.9	20.85	1241.3	7.77	1.34319	0	20	15790	1282	2164	8354	185	20599	0.153459
18	0.15365	0.00143	8.93452	0.31387	0.42994	0.00315	0.208557	2387	15.78	2331.3	32.08	2305.5	14.22	3.41433	0	10	47982	7253	11794	22424	280	30920	0.323448
19	0.18645	0.00279	14.8876	1.14442	0.54048	0.00795	0.191349	2711.1	24.44	2808.1	73.14	2785.5	33.26	-2.74427	0	10	19416	3561	1189	3586	82	9954	0.993028
20	0.17893	0.00335	10.8113	0.91991	0.47863	0.00863	0.211906	2643	30.72	2507	79.08	2521.3	37.62	4.60462	23	12	10445	1838	1868	3839	58	6050	0.478771
21	0.07431	0.00079	1.87923	0.04233	0.18177	0.00099	0.241794	1050	21.32	1073.8	14.93	1076.7	5.39	-2.54286	19	0	21325	1558	1656	7076	286	32528	0.220181
22	0.17293	0.00112	10.9423	0.22423	0.47354	0.0021	0.216411	2586.2	10.77	2518.2	19.07	2499.1	9.18	3.36788	7	3	63364	10773	8842	17242	340	37107	0.624812
23	0.1172	0.00208	5.11389	0.30015	0.32816	0.00431	0.223771	1914	31.45	1838.4	49.85	1829.5	20.93	4.41484	2	1	9265	1067	3475	8263	72	7831	0.12913
24	0.11179	0.00121	4.63111	0.15084	0.30616	0.00221	0.221622	1828.8	19.48	1754.9	27.2	1721.8	10.91	5.85083	3	15	18491	2032	1447	4142	151	16754	0.490584
25	0.1126	0.00121	5.01058	0.16589	0.33445	0.00245	0.22126	1841.8	19.31	1821.1	28.02	1859.9	11.82	-0.982734	0	0	19514	2159	4727	12132	149	16190	0.177959
26	0.09834	0.00085	3.97015	0.0924	0.28617	0.00148	0.222215	1592.8	16.14	1628.1	18.88	1622.4	7.44	-1.85836	4	0	29527	2853	3575	10751	248	28634	0.265371
27	0.07712	0.00109	2.16453	0.07055	0.19556	0.00148	0.232193	1124.4	27.91	1169.7	22.64	1151.4	7.98	-2.40128	0	0	10993	833	1538	5866	133	15603	0.142005
28	0.07536	0.00132	2.15296	0.09036	0.20114	0.0019	0.225069	1078.1	34.78	1166	29.1	1181.4	10.18	-9.58167	45	26	7048	521	668	2592	83	9727	0.201003
29	0.09387	0.00138	3.15271	0.12658	0.25807	0.00236	0.227768	1505.5	27.49	1445.7	30.95	1479.9	12.08	1.70043	0	0	8691	801	804	2389	88	9350	0.335287
30	0.16715	0.00178	10.0614	0.432	0.46486	0.00426	0.213433	2529.4	17.73	2440.4	39.66	2461	18.73	2.7042	23	10	21203	3481	5575	10600	119	12669	0.328396
31	0.08977	0.00075	3.04458	0.06026	0.24532	0.00113	0.232725	1420.6	15.96	1418.9	15.13	1414.3	5.86	0.443475	10	1	35487	3129	4050	14242	356	40188	0.219702
32	0.11821	0.00103	5.46844	0.14202	0.33619	0.00191	0.218757	1929.3	15.5	1895.7	22.29	1868.3	9.23	3.16177	0	4	46063	5347	9904	25985	339	38071	0.205773
33	0.15625	0.00168	9.39924	0.39421	0.43616	0.00386	0.211012	2415.5	18.15	2377.8	38.49	2333.4	17.31	3.39888	34	10	22064	3385	2269	4511	124	14058	0.750388
34	0.0691	0.00078	1.40236	0.03035	0.14809	0.00081	0.252732	901.7	23.2	889.9	12.83	890.3	4.56	1.26428	29	7	30966	2100	2837	14578	519	58127	0.144053
35	0.10894	0.0018	5.08582	0.28082	0.34107	0.00403	0.21399	1781.8	29.86	1833.7	46.85	1891.8	19.39	-6.17353	0	25	11431	1222	1415	3234	83	9318	0.37786
36	0.1856	0.00151	12.5587	0.4018	0.50671	0.00334	0.206026	2703.6	13.39	2647.1	30.09	2642.6	14.3	2.25625	28	4	34357	6259	3274	5159	173	18854	1.21322
37	0.08285	0.00104	2.40722	0.07098	0.2097	0.00145	0.234504	1265.6	24.18	1244.8	21.15	1227.2	7.74	3.03413	0	2	13714	1115	1801	6628	160	18189	0.168226
38	0.11488	0.00205	5.129	0.34337	0.32821	0.00419	0.190692	1878	31.8	1840.9	56.89	1829.7	20.33	2.57188	28	12	7125	803	1101	2597	54	6039	0.309203
39	0.09255	0.00143	3.061	0.123	0.24311	0.00226	0.231347	1478.5	29.09	1423	30.75	1402.9	11.72	5.11329	35	0	18795	1702	4098	13776	194	21603	0.123548
40	0.07135	0.0013	1.5412	0.05831	0.16687	0.00156	0.247094	967.3	36.82	947	23.3	994.9	8.64	-2.8533	0	21	9536	665	997	4735	151	15973	0.140444
41	0.06856	0.00116	1.55773	0.0542	0.15452	0.0013	0.241797	885.4	34.7	953.6	21.52	926.2	7.28	-4.60809	0	12	28252	1895	1834	10641	426	51116	0.178085
42	0.07275	0.00075	1.67863	0.03359	0.17024	0.00086	0.252454	1006.9	20.8	1000.5	12.73	1013.4	4.72	-0.645546	0	1	26384	1877	2156	16442	391	43334	0.114159
43	0.1211	0.00118	5.44674	0.15483	0.34631	0.00226	0.229575	1972.4	17.31	1892.2	24.39	1916.9	10.81	2.81383	11	0	20378	2414	3598	11996	155	16458	0.201234
44	0.08603	0.00102	2.56203	0.07087	0.22287	0.00148	0.240067	1338.7	22.72	1289.9	20.2	1297	7.79	3.11496	0	11	15681	1319	2075	7957	180	19682	0.165766
45	0.09062	0.00088	2.95177	0.06622	0.23893	0.00127	0.236933	1438.4	18.35	1395.3	17.02	1381.1	6.62	3.98359	1	3	31068	2753	3214	11428	327	36379	0.2409
46	0.07076	0.00068	1.52468	0.027	0.15839	0.00072	0.256696	950.5	19.61	940.4	10.86	947.8	4.02	0.284061	2	0	33430	2313	4885	29574	532	59057	0.0782106
47	0.08683	0.00099	2.83581	0.07758	0.23543	0.0015	0.232893	1356.7	21.77	1365.1	20.54	1362.9	7.8	-0.456991	15	0	17598	1494	1318	4516	184	20919	0.330824
48	0.08371	0.00108	2.4642	0.07564	0.21595	0.00155	0.233831	1285.7	25.08	1261.6	22.17	1260.4	8.23	1.9678	46	0	13002	1064	1796	6787	151	16855	0.15677
49	0.11333	0.00158	5.25882	0.23417	0.3277	0.00313	0.214499	1853.5	24.93	1862.2	37.99	1827.2	15.21	1.41894	29	0	29181	3233	1607	4176	215	24932	0.774186
50	0.11422	0.00144	5.21261	0.20502	0.32908	0.00283	0.218647	1867.6	22.64	1854.7	33.51	1833.9	13.71	1.80445	0	0	21214	2368	2226	5596	159	18052	0.423159
51	0.07142	0.00179	1.39338	0.06993	0.14925	0.00189	0.252321	969.4	50.44	886.1	29.67	896.7	10.57	7.49948	36	0	9286	648	862	4037	163	17427	0.160515
52	0.08473	0.0014	2.95761	0.12943	0.23173	0.00222	0.218916	1309.3	31.75	1396.8	33.21	1343.5	11.62	-2.61208	10	0	9146	757	776	2580	90	11056	0.293411
53	0.11076	0.00103	4.31777	0.10332	0.29183	0.00163	0.233417	1811.9	16.86	1696.8	19.73	1650.7	8.11	8.89674	0	0	31085	3364	6110	22437	273	29846	0.149931
54	0.09508	0.0018	3.51599	0.2034	0.27279	0.0033	0.209114	1529.7	35.28	1530.8	45.73	1554.9	16.71	-1.64738	0	0	5085	472	2605	8176	47	5225	0.0577299
55	0.07459	0.00072	1.73663	0.03161	0.16925	0.00078	0.253191	1057.3	19.58	1022.2	11.73	1008	4.31	4.66282	18	0	40503	2951	2864	13763	598	67095	0.214415
05ADb35
1	0.12328	0.00103	5.80862	0.10616	0.34638	0.00196	0.30961	2004.2	14.78	1947.7	15.83	1917.3	9.4	4.33589	41	16	61758	7601	12731	18421	1171	68129	0.412627
2	0.18992	0.00148	14.0358	0.32357	0.54065	0.00365	0.29285	2741.5	12.76	2752.1	21.85	2786.2	15.27	-1.63049	0	0	26926	5106	6668	5949	326	19042	0.858296
3	0.1137	0.00061	5.13443	0.05149	0.33307	0.00106	0.317351	1859.3	9.69	1841.8	8.52	1853.2	5.11	0.32808	9	7	84744	9622	13437	20237	1680	97345	0.475466
4	0.1808	0.00191	13.8516	0.4549	0.53163	0.00495	0.283518	2660.2	17.43	2739.6	31.1	2748.3	20.82	-3.31178	19	0	36006	6501	12706	12138	421	25928	0.535591
5	0.11909	0.00191	6.2307	0.23277	0.3671	0.00412	0.300416	1942.6	28.44	2008.8	32.69	2015.7	19.44	-3.763	0	0	12603	1499	8700	12128	216	13152	0.123598
6	0.11915	0.0014	5.00789	0.12433	0.32394	0.00257	0.319556	1943.5	20.89	1820.7	21.01	1809	12.53	6.9205	25	23	25512	3037	10142	14741	545	30208	0.206024
7	0.14828	0.00087	8.82768	0.1212	0.43442	0.00181	0.303468	2326.2	10.08	2320.4	12.52	2325.6	8.11	0.0257931	86	0	86136	12764	17511	20261	1302	76102	0.629979
8	0.15792	0.00111	9.72737	0.17345	0.45947	0.00246	0.300261	2433.5	11.86	2409.3	16.42	2437.2	10.88	-0.152044	0	41	93663	14784	23284	28150	1369	78290	0.525187
9	0.18217	0.00093	12.9971	0.16477	0.51399	0.00194	0.297726	2672.7	8.43	2679.4	11.95	2673.7	8.26	-0.0374153	0	0	69160	12595	21288	21012	874	51709	0.599419
10	0.11199	0.0008	5.18778	0.07466	0.33339	0.00149	0.310547	1832	12.82	1850.6	12.25	1854.8	7.18	-1.24454	14	18	37021	4145	5349	7787	721	42701	0.532297
11	0.11154	0.00058	5.10843	0.0482	0.33224	0.00099	0.315808	1824.7	9.39	1837.5	8.01	1849.2	4.8	-1.34269	0	0	98731	11018	13026	18906	1954	114638	0.582778
12	0.1141	0.0006	5.25121	0.05099	0.33606	0.00104	0.318706	1865.7	9.5	1861	8.28	1867.7	5	-0.107198	13	0	88205	10071	21349	30272	1739	101318	0.332684
13	0.11268	0.00125	5.27506	0.12376	0.34085	0.00248	0.310124	1843	19.92	1864.8	20.03	1890.8	11.91	-2.5936	0	42	20985	2366	8437	11725	407	23781	0.201791
14	0.18317	0.00146	12.9703	0.2951	0.52243	0.00355	0.298663	2681.8	13.14	2677.5	21.45	2709.5	15.01	-1.03289	2	50	33368	6118	10495	9953	428	24687	0.614689
15	0.11238	0.00091	5.02783	0.08136	0.33327	0.0017	0.315226	1838.3	14.54	1824	13.7	1854.2	8.23	-0.86493	71	9	29399	3307	5563	7837	598	34117	0.421973
16	0.18269	0.00076	12.8458	0.10448	0.51475	0.00129	0.30812	2677.4	6.86	2668.4	7.66	2676.9	5.5	0.0186748	0	23	201732	36906	37467	35977	2616	151765	1.02582
17	0.14824	0.00067	8.48861	0.07214	0.41784	0.00112	0.315405	2325.7	7.69	2284.7	7.72	2250.7	5.08	3.22484	0	0	157913	23446	44399	52535	2517	146448	0.446293
18	0.11234	0.00055	5.02906	0.04217	0.33021	0.00089	0.321427	1837.5	8.81	1824.2	7.1	1839.4	4.33	-0.103401	0	0	124827	14046	11873	16954	2547	146580	0.828477
19	0.18608	0.00085	13.5297	0.13639	0.52293	0.00159	0.301618	2707.8	7.51	2717.4	9.53	2711.6	6.73	-0.140335	23	0	133118	24817	42813	40985	1674	98770	0.605514
20	0.11152	0.00085	4.98453	0.07483	0.32483	0.00154	0.315801	1824.4	13.8	1816.7	12.7	1813.3	7.51	0.608419	41	0	34324	3835	9889	13969	703	41025	0.274536
21	0.19031	0.00128	13.4968	0.24394	0.51955	0.00283	0.301374	2744.8	10.99	2715.1	17.09	2697.3	12.02	1.73055	0	41	32913	6282	4491	3871	427	24706	1.62284
22	0.18281	0.00095	13.2607	0.16443	0.52091	0.00193	0.298799	2678.5	8.57	2698.4	11.71	2703	8.2	-0.914691	10	6	77358	14186	18857	18167	983	57955	0.780866
23	0.1137	0.00148	5.1388	0.14283	0.32925	0.00284	0.310338	1859.4	23.29	1842.5	23.62	1834.7	13.76	1.32839	72	16	26153	2983	1147	1329	534	31019	2.24454
24	0.10142	0.00082	3.81017	0.05617	0.27626	0.00132	0.324113	1650.4	14.9	1594.9	11.86	1572.5	6.65	4.72007	7	36	62715	6383	16440	28947	1543	88708	0.220506
25	0.18486	0.00158	13.5549	0.33372	0.52018	0.00378	0.295156	2697	14.02	2719.1	23.28	2699.9	16.01	-0.107527	0	31	32067	5949	10829	9693	404	24104	0.613742
26	0.1125	0.00055	5.16286	0.04247	0.33613	0.0009	0.325494	1840.1	8.89	1846.5	7	1868	4.32	-1.51622	18	0	221011	24959	17120	23588	4464	257429	1.05812
27	0.17803	0.00107	11.5838	0.16766	0.48598	0.00214	0.304239	2634.6	9.91	2571.4	13.53	2553.2	9.3	3.08965	63	0	80971	14473	16590	16070	1154	65275	0.900622
28	0.14752	0.00096	8.45472	0.12457	0.42488	0.00193	0.308302	2317.3	11.16	2281.1	13.38	2282.6	8.72	1.49743	57	28	116801	17302	52134	62445	1892	107770	0.277076
29	0.1267	0.00071	6.05947	0.06355	0.35347	0.00119	0.321006	2052.7	9.86	1984.4	9.14	1951.2	5.65	4.94471	45	65	81103	10320	25067	35676	1576	90008	0.28927
30	0.11091	0.00078	4.72244	0.06198	0.31279	0.00132	0.321541	1814.4	12.69	1771.2	11	1754.4	6.49	3.30688	31	1	44384	4944	12942	21608	970	55699	0.228804
31	0.11237	0.00069	4.97755	0.05641	0.32883	0.0012	0.32201	1838	11.14	1815.5	9.58	1832.7	5.8	0.288357	58	1	97666	11026	5884	8298	2055	116741	1.32875
32	0.11888	0.00088	5.58119	0.08231	0.3439	0.0016	0.315473	1939.5	13.11	1913.2	12.7	1905.4	7.69	1.75819	44	20	42813	5114	35888	48508	851	48962	0.105426
33	0.18744	0.00155	12.9944	0.29682	0.52181	0.00366	0.307065	2719.8	13.59	2679.2	21.54	2706.8	15.51	0.477976	0	0	28751	5416	3714	3113	387	21684	1.7398
34	0.11372	0.00079	5.05721	0.06703	0.33151	0.00141	0.320896	1859.7	12.56	1829	11.24	1845.7	6.84	0.75281	15	12	45800	5235	4084	5585	963	54408	0.937332
35	0.18495	0.00104	13.024	0.17428	0.51914	0.00211	0.303735	2697.7	9.3	2681.4	12.62	2695.5	8.95	0.081551	4	33	63533	11813	19059	18263	844	48227	0.646827
36	0.1174	0.0007	5.54026	0.06113	0.3415	0.0012	0.318468	1917.1	10.7	1906.9	9.49	1893.9	5.78	1.21016	0	0	68866	8130	14663	20681	1368	79571	0.393114
37	0.1492	0.00086	8.89189	0.10807	0.43197	0.00162	0.308568	2336.8	9.87	2327	11.09	2314.6	7.31	0.950017	5	0	67033	10059	20517	22863	1055	61272	0.439969
38	0.12177	0.00073	6.05316	0.06916	0.3633	0.00132	0.318006	1982.3	10.72	1983.5	9.96	1997.8	6.22	-0.78192	31	32	85552	10480	21741	29045	1617	93041	0.360819
39	0.1853	0.00137	13.0273	0.25591	0.50763	0.00301	0.301847	2700.9	12.17	2681.6	18.52	2646.5	12.87	2.01414	36	14	28300	5276	2895	2429	378	22041	2.17209
40	0.11202	0.00077	5.14289	0.06671	0.3272	0.00134	0.315724	1832.5	12.37	1843.2	11.03	1824.8	6.5	0.420191	0	0	70316	7926	10202	14580	1442	85019	0.543621
41	0.11078	0.00173	5.22745	0.17613	0.33243	0.00344	0.307125	1812.3	28.17	1857.1	28.72	1850.1	16.66	-2.08575	0	13	25808	2877	7239	10606	515	30755	0.271262
42	0.11299	0.00063	5.06202	0.0477	0.32197	0.00098	0.32301	1848	10.06	1829.8	7.99	1799.4	4.8	2.62987	0	0	120889	13750	23550	34936	2547	148833	0.393577
43	0.14089	0.00152	8.34928	0.22251	0.4201	0.00335	0.299221	2238.2	18.51	2269.7	24.17	2260.9	15.22	-1.01421	44	45	39176	5557	9771	12152	624	36990	0.457291
44	0.11056	0.00072	4.86391	0.05698	0.32504	0.00123	0.323021	1808.7	11.81	1796	9.87	1814.3	5.98	-0.309615	151	0	64848	7219	9562	15106	1394	79188	0.47789
45	0.18131	0.00123	12.8469	0.21967	0.51118	0.00262	0.299747	2664.9	11.21	2668.5	16.11	2661.7	11.18	0.12008	24	68	52374	9563	12528	12099	700	40693	0.790396
46	0.11227	0.00095	5.00849	0.08291	0.31886	0.00167	0.316385	1836.5	15.25	1820.8	14.01	1784.1	8.16	2.85325	18	16	66456	7516	18300	28750	1413	82889	0.261426
47	0.17292	0.00132	12.3777	0.24627	0.49946	0.00292	0.29384	2586.1	12.68	2633.5	18.69	2611.5	12.57	-0.982174	0	0	80302	13991	13410	13753	1065	63983	1.01731
48	0.1135	0.00066	4.591	0.0437	0.29842	0.00094	0.330922	1856.2	10.46	1747.6	7.94	1683.5	4.67	9.30395	54	34	209554	23967	14713	46243	4925	279642	0.518284
49	0.1983	0.00111	14.6194	0.18285	0.53784	0.00206	0.306231	2812.2	9.1	2790.8	11.89	2774.4	8.62	1.34414	31	8	75646	15118	23024	21456	976	56046	0.704605
50	0.18321	0.0009	12.8827	0.1126	0.50374	0.00139	0.315701	2682.1	8.09	2671.1	8.24	2629.8	5.94	1.94996	78	3	184155	34008	98764	98619	2494	145774	0.344842
51	0.11336	0.00076	4.99284	0.05924	0.32317	0.00125	0.325995	1854	12.04	1818.1	10.04	1805.2	6.07	2.63215	0	51	56287	6433	12443	18575	1219	69544	0.346326
52	0.15077	0.00129	8.90651	0.18022	0.4279	0.00265	0.306061	2354.7	14.56	2328.5	18.47	2296.2	11.96	2.48439	3	38	73891	11234	29439	34330	1195	68994	0.327236
53	0.15323	0.00092	9.12506	0.10921	0.42377	0.00158	0.31153	2382.3	10.15	2350.6	10.95	2277.6	7.15	4.39491	32	14	233060	36018	76922	90433	3743	219878	0.398284
54	0.17962	0.00112	12.7326	0.18281	0.51242	0.00224	0.304466	2649.4	10.35	2660.1	13.52	2666.9	9.56	-0.660527	0	0	64363	11662	6453	6143	869	50252	1.89842
55	0.18627	0.00136	13.5935	0.25504	0.51981	0.0029	0.297355	2709.5	11.99	2721.8	17.74	2698.4	12.32	0.40967	39	48	58635	11019	10883	10092	769	45158	1.09185
56	0.11685	0.00067	5.31929	0.04999	0.33274	0.00103	0.329384	1908.5	10.33	1872	8.03	1851.7	4.98	2.97616	3	27	115811	13656	9837	14422	2442	139522	0.946887
57	0.11125	0.00066	4.96065	0.04782	0.32741	0.00103	0.326343	1819.9	10.7	1812.6	8.15	1825.8	5.02	-0.324194	83	18	220759	24787	15314	22282	4758	270470	1.11242
58	0.115	0.00083	5.24401	0.06956	0.33631	0.00144	0.322795	1879.9	12.98	1859.8	11.31	1868.9	6.93	0.585138	51	11	49362	5730	5054	7249	1041	58915	0.790454
59	0.11164	0.00079	5.30148	0.06835	0.34021	0.0014	0.319183	1826.3	12.82	1869.1	11.01	1887.7	6.72	-3.36199	23	0	53273	6004	6544	9382	1080	62896	0.639949
60	0.15269	0.00087	9.23816	0.09541	0.43557	0.00143	0.317885	2376.2	9.64	2361.9	9.46	2330.8	6.41	1.91061	16	19	107437	16564	14486	16212	1711	99140	1.02171
61	0.115	0.00082	5.22968	0.06688	0.33141	0.00137	0.323246	1879.9	12.78	1857.5	10.9	1845.2	6.65	1.84584	0	20	53727	6240	2343	3071	1141	65248	2.03191
62	0.11015	0.00064	4.8485	0.04318	0.32381	0.00096	0.332894	1801.9	10.48	1793.4	7.5	1808.3	4.66	-0.355181	34	0	196281	21841	12505	18442	4311	244122	1.18431
63	0.18694	0.00132	13.3376	0.2272	0.51731	0.00267	0.30299	2715.4	11.6	2703.8	16.09	2687.8	11.35	1.01642	0	20	71175	13443	9082	9184	965	55448	1.46374
64	0.11513	0.00075	5.39664	0.06053	0.33855	0.00123	0.323918	1881.9	11.71	1884.3	9.61	1879.7	5.91	0.116903	57	0	75522	8786	11311	16831	1560	89962	0.522013
65	0.12104	0.00069	5.70049	0.05024	0.34259	0.001	0.331198	1971.7	10.08	1931.4	7.61	1899.1	4.81	3.6821	55	12	147472	18040	28860	43819	3036	173711	0.411694
66	0.11678	0.00088	5.63956	0.07915	0.3465	0.00155	0.31873	1907.4	13.49	1922.2	12.1	1917.9	7.44	-0.550488	61	0	45020	5314	13367	19488	905	52502	0.272681
67	0.18465	0.00157	13.2694	0.29316	0.51651	0.00342	0.299704	2695.1	13.95	2699	20.86	2684.4	14.53	0.397017	17	21	64853	12107	15390	15197	877	50771	0.79667
68	0.18198	0.00096	12.8339	0.10592	0.50985	0.00137	0.325582	2671	8.71	2667.5	7.77	2656	5.85	0.561587	62	0	258448	47559	66602	64765	3568	205110	0.734332
69	0.20259	0.00182	15.3625	0.38289	0.55255	0.00409	0.296988	2847.1	14.52	2838	23.76	2835.8	16.97	0.396895	0	0	108748	22281	9779	9125	1397	79688	2.44175
70	0.10786	0.00111	4.76433	0.15499	0.31785	0.00212	0.205027	1763.7	18.6	1778.6	27.3	1779.2	10.35	-0.878834	13	7	18163	1922	2698	7171	140	15907	0.268024
71	0.18288	0.00204	12.5901	0.61498	0.51551	0.00529	0.210081	2679.1	18.38	2649.5	45.95	2680.1	22.48	-0.037326	0	3	15448	2771	4285	8452	76	8343	0.327851
72	0.15508	0.00166	11.1835	0.53011	0.4792	0.00432	0.190186	2402.7	18.1	2538.5	44.18	2523.8	18.85	-5.04016	0	0	16363	2489	2907	5495	77	9508	0.452957
73	0.11091	0.00104	4.85686	0.13029	0.31324	0.00188	0.22373	1814.4	17.01	1794.8	22.59	1756.6	9.24	3.18563	0	0	22629	2461	1131	3185	176	20119	0.772684
74	0.18756	0.0023	13.5125	0.79626	0.53258	0.00624	0.198829	2720.9	20.04	2716.2	55.71	2752.3	26.25	-1.15403	0	6	16561	3046	1525	2010	78	8661	1.51542
75	0.34347	0.00227	34.4542	0.97455	0.75246	0.00437	0.205323	3678.3	10.04	3623.1	27.91	3616.6	16.08	1.67741	13	20	43642	14697	10642	13938	148	16159	1.05446
76	0.11294	0.00088	4.66117	0.09311	0.31365	0.00145	0.231431	1847.2	14.07	1760.3	16.7	1758.6	7.14	4.79645	53	3	40860	4524	5964	20401	338	36302	0.221754
77	0.14909	0.00165	8.11917	0.3346	0.42811	0.00381	0.215951	2335.5	18.89	2244.4	37.26	2297.2	17.18	1.63991	27	0	20702	3025	5075	11148	129	13477	0.271349
78	0.19017	0.00148	12.3869	0.34875	0.50118	0.00302	0.214023	2743.6	12.76	2634.2	26.45	2618.8	12.98	4.54877	23	60	54894	10232	12391	59602	287	30531	0.171672
79	0.1174	0.0012	5.3463	0.16713	0.34776	0.00243	0.223525	1917	18.28	1876.3	26.74	1923.9	11.61	-0.359937	48	0	28427	3270	1573	3753	213	22789	0.871303
80	0.08564	0.00163	2.69581	0.13772	0.23019	0.00259	0.220245	1330	36.46	1327.3	37.84	1335.5	13.55	-0.413534	17	0	6612	554	817	2806	71	8011	0.197434
81	0.1144	0.00086	5.02914	0.09476	0.31866	0.00138	0.229837	1870.5	13.43	1824.2	15.96	1783.2	6.73	4.6672	6	20	59532	6673	6255	17073	462	52108	0.390851
82	0.15493	0.00134	8.64566	0.25222	0.43709	0.0028	0.219587	2401	14.62	2301.4	26.55	2337.6	12.58	2.64057	0	0	31149	4728	2927	8362	190	19880	0.565415
83	0.21195	0.00224	15.5933	0.78088	0.55198	0.00552	0.199696	2920.5	17	2852.2	47.78	2833.4	22.95	2.98237	33	9	23920	4966	4984	10422	111	12090	0.476492
84	0.16591	0.00264	8.61735	0.54557	0.42165	0.00582	0.218019	2516.8	26.49	2298.4	57.6	2268	26.37	9.88557	17	0	15815	2570	4726	9441	104	10466	0.272217
85	0.1785	0.00149	11.8608	0.36656	0.49572	0.00327	0.213443	2639	13.81	2593.5	28.94	2595.4	14.1	1.65214	57	16	30115	5264	5923	11571	155	16957	0.45493
86	0.11982	0.00144	5.93279	0.23491	0.3586	0.00307	0.216215	1953.5	21.37	1966	34.41	1975.5	14.56	-1.12618	4	10	16300	1912	3239	7564	112	12690	0.252776
87	0.1122	0.00106	5.22268	0.14203	0.33055	0.00199	0.221375	1835.4	16.97	1856.3	23.18	1841	9.62	-0.305111	15	15	31581	3469	2384	6401	232	26677	0.541947
88	0.11239	0.00169	5.45282	0.27169	0.33982	0.00359	0.212028	1838.4	26.91	1893.2	42.75	1885.8	17.27	-2.57833	6	0	28632	3150	2362	5621	202	23529	0.560399
89	0.18391	0.0022	12.0074	0.62983	0.49721	0.00537	0.205901	2688.4	19.67	2605	49.17	2601.8	23.12	3.22125	0	6	17972	3235	3894	6918	94	10095	0.467621
05ADb36
1	0.18679	0.00157	13.6099	0.4176	0.51989	0.00323	0.202482	2714.1	13.78	2723	29.02	2698.7	13.7	0.567407	0	0	29824	5439	7321	13524	140	16096	0.402174
2	0.20327	0.00346	13.9105	1.13999	0.5294	0.00887	0.204447	2852.6	27.48	2743.6	77.63	2738.9	37.39	3.98584	26	9	20564	4080	1337	2307	103	10901	1.76853
3	0.12157	0.00265	5.15065	0.37379	0.34219	0.00558	0.224699	1979.3	38.37	1844.5	61.71	1897.2	26.78	4.14793	15	0	8199	973	2638	5976	66	6725	0.162818
4	0.13028	0.00243	6.79856	0.45801	0.38959	0.00569	0.216794	2101.7	32.37	2085.5	59.63	2120.9	26.4	-0.913546	0	10	12132	1542	1862	4094	80	8742	0.376649
5	0.1146	0.00154	5.30464	0.23183	0.33015	0.00302	0.209306	1873.6	24.11	1869.6	37.34	1839.1	14.66	1.84137	30	0	18610	2081	1919	4957	138	15825	0.41981
6	0.17849	0.00295	12.3246	0.93264	0.52636	0.00816	0.204864	2638.9	27.15	2629.4	71.07	2726.1	34.46	-3.30441	2	0	17765	3094	6559	11866	88	9479	0.260745
7	0.11765	0.00122	5.23052	0.15555	0.33478	0.00222	0.222981	1920.8	18.44	1857.6	25.35	1861.5	10.72	3.08726	0	9	19500	2238	2694	6853	151	16361	0.326572
8	0.18497	0.00204	14.2417	0.72977	0.54047	0.00527	0.19029	2698	18.06	2765.9	48.62	2785.4	22.06	-3.23944	6	0	14123	2548	2415	4007	63	7341	0.635887
9	0.1881	0.00298	12.102	0.8461	0.5192	0.00778	0.214329	2725.6	25.83	2612.3	65.57	2695.8	33	1.09334	1	6	15779	2895	2617	4692	84	8540	0.617008
10	0.1228	0.00175	6.29683	0.33574	0.38382	0.00403	0.196923	1997.3	25.17	2018	46.72	2094.1	18.76	-4.84654	0	13	8752	1048	1991	4475	58	6410	0.23419
11	0.09087	0.00111	3.26274	0.09932	0.25194	0.00175	0.228185	1443.7	23.04	1472.2	23.66	1448.5	9.01	-0.332479	26	0	15427	1366	1875	6296	148	17215	0.216963
12	0.10926	0.00282	4.24598	0.33586	0.29538	0.00524	0.224269	1787	46.39	1683	65.01	1668.4	26.1	6.63682	0	0	5949	633	1443	3536	52	5664	0.179016
13	0.11168	0.00209	5.0215	0.30563	0.3325	0.00447	0.220878	1827	33.48	1823	51.54	1850.5	21.61	-1.28626	0	0	13399	1459	3084	7640	102	11333	0.190969
14	0.08531	0.00137	2.61041	0.10142	0.23276	0.00215	0.237747	1322.5	30.98	1303.6	28.52	1349	11.26	-2.00378	18	13	11777	979	1447	5214	132	14232	0.187764
15	0.11218	0.00204	5.37277	0.33979	0.34331	0.00446	0.205417	1835	32.6	1880.5	54.14	1902.6	21.4	-3.68392	0	10	7960	870	458	835	57	6524	1.04192
16	0.1608	0.00213	10.8044	0.60217	0.47315	0.00523	0.198328	2464.1	22.2	2506.4	51.8	2497.4	22.88	-1.35141	37	0	18665	2925	2729	5249	95	11101	0.557249
17	0.1863	0.00414	12.2014	1.24672	0.50811	0.011	0.211873	2709.7	36.17	2620	95.89	2648.6	47.01	2.25486	55	13	10442	1895	1269	2130	55	5784	0.889671
18	0.13981	0.00265	7.52279	0.53476	0.39597	0.00602	0.213872	2224.9	32.49	2175.7	63.71	2150.4	27.79	3.34847	14	0	15116	2059	1471	3634	97	10746	0.566593
19	0.18209	0.00191	11.7652	0.46196	0.50363	0.00423	0.213907	2672	17.27	2585.9	36.75	2629.4	18.14	1.59431	7	7	25464	4517	3809	7150	136	14235	0.631748
20	0.19919	0.00241	16.3577	0.97202	0.56227	0.00623	0.186462	2819.6	19.66	2897.9	56.86	2876	25.72	-2.00028	0	0	14572	2827	2600	4402	61	7300	0.642208
21	0.11493	0.0013	5.6189	0.1929	0.34123	0.00248	0.211701	1878.8	20.25	1919	29.59	1892.6	11.92	-0.734511	0	8	16411	1837	3387	9156	116	13551	0.200633
22	0.13034	0.0017	6.88331	0.30953	0.3862	0.00372	0.214203	2102.5	22.72	2096.5	39.87	2105.2	17.31	-0.128419	20	0	9997	1268	897	1955	65	7295	0.648593
23	0.1752	0.00258	10.5321	0.63408	0.46505	0.00592	0.211444	2607.9	24.29	2482.8	55.83	2461.8	26.05	5.60221	8	13	18965	3235	2340	4056	109	11494	0.797584
24	0.11289	0.00136	5.33704	0.20396	0.33745	0.00263	0.20394	1846.5	21.62	1874.8	32.68	1874.4	12.65	-1.51097	7	0	14228	1563	1130	2523	104	11887	0.619501
25	0.12214	0.00276	4.81964	0.34637	0.3207	0.00527	0.228658	1987.7	39.63	1788.3	60.43	1793.2	25.71	9.78518	14	5	4415	525	758	1808	38	3882	0.290376
26	0.10961	0.00276	5.45027	0.47693	0.33319	0.00593	0.203388	1792.9	45.22	1892.8	75.08	1853.8	28.65	-3.39673	0	13	8379	894	1880	4437	58	7092	0.201487
27	0.12148	0.0034	4.90334	0.4443	0.32554	0.00675	0.228831	1978.1	48.99	1802.8	76.42	1816.7	32.82	8.15934	35	0	6228	736	1910	4944	53	5396	0.148867
28	0.16909	0.00201	11.3184	0.51901	0.49095	0.00473	0.210104	2548.7	19.76	2549.7	42.78	2574.8	20.46	-1.02405	0	7	15812	2602	3861	7255	81	9085	0.358649
29	0.12101	0.0012	5.80346	0.15479	0.35095	0.0021	0.224346	1971.2	17.59	1946.9	23.1	1939.1	10.04	1.62845	30	0	26789	3154	6313	16332	193	21540	0.193118
30	0.18309	0.00244	14.2659	0.88125	0.52505	0.00617	0.190232	2681	21.83	2767.5	58.62	2720.6	26.09	-1.47706	7	24	16532	2944	5322	9830	73	8886	0.299491
31	0.115	0.00125	5.15331	0.16189	0.32556	0.00217	0.212175	1879.8	19.49	1844.9	26.71	1816.8	10.54	3.35142	6	22	26434	2957	2639	7076	204	22920	0.417891
32	0.18156	0.00165	12.527	0.36328	0.50452	0.00309	0.211197	2667.2	14.99	2644.8	27.27	2633.2	13.25	1.27475	0	8	49735	8783	7334	13694	249	27831	0.641376
33	0.18127	0.00193	12.5255	0.51635	0.50078	0.00413	0.200057	2664.6	17.53	2644.6	38.76	2617.2	17.75	1.77888	21	21	22532	3972	2287	3973	112	12704	0.999748
34	0.1161	0.00131	5.14611	0.15926	0.32055	0.00223	0.224792	1897	20.14	1843.8	26.31	1792.4	10.88	5.51397	30	0	30152	3404	3699	10238	235	26568	0.332487
35	0.11039	0.0015	4.82055	0.18699	0.32095	0.0028	0.224905	1805.8	24.45	1788.5	32.62	1794.4	13.67	0.631299	12	4	19865	2132	2687	7090	157	17485	0.300705
36	0.11658	0.00108	5.43566	0.11947	0.33813	0.00173	0.232785	1904.4	16.59	1890.5	18.85	1877.7	8.32	1.40202	44	2	40748	4618	221	332	302	34049	13.9096
37	0.19056	0.00234	12.6557	0.61697	0.51731	0.00547	0.216899	2747	20.06	2654.4	45.88	2687.8	23.25	2.15508	0	9	15703	2909	4771	8439	81	8578	0.344709
38	0.20398	0.00178	14.7267	0.36642	0.53675	0.00293	0.219393	2858.3	14.13	2797.7	23.66	2769.8	12.3	3.09625	31	6	45686	9055	3281	5313	219	24071	1.70431
39	0.08734	0.00132	2.79773	0.10319	0.23778	0.00202	0.230327	1367.9	28.82	1354.9	27.59	1375.1	10.52	-0.526354	0	0	9951	844	1056	4008	107	11837	0.210579
40	0.1156	0.00141	4.83264	0.16233	0.32079	0.00244	0.226441	1889.2	21.76	1790.6	28.26	1793.6	11.93	5.06034	0	0	14779	1659	1822	5426	122	13033	0.30575
41	0.10547	0.00136	4.0587	0.13808	0.28375	0.0022	0.227899	1722.4	23.56	1646	27.72	1610.2	11.05	6.51417	0	22	18753	1921	2254	6416	169	18699	0.299408
42	0.11552	0.00123	5.4186	0.15124	0.33419	0.00211	0.226209	1887.9	19.08	1887.8	23.93	1858.7	10.19	1.54669	0	1	23737	2663	1329	3388	175	20103	0.786009
43	0.18319	0.00207	13.0825	0.55703	0.50373	0.00438	0.204215	2682	18.52	2685.6	40.16	2629.8	18.8	1.94631	27	24	24092	4286	8639	16656	117	13538	0.257325
44	0.11384	0.0015	5.11261	0.19313	0.34035	0.00289	0.224784	1861.6	23.61	1838.2	32.08	1888.4	13.92	-1.43962	8	0	21620	2390	3992	10646	167	17984	0.224497
45	0.18964	0.00177	13.289	0.36661	0.51844	0.00313	0.218844	2739	15.24	2700.4	26.05	2692.6	13.28	1.69405	10	10	44231	8144	8051	15006	219	24157	0.542716
46	0.09123	0.00101	3.12185	0.07653	0.25188	0.00146	0.23645	1451.2	20.89	1438.1	18.85	1448.2	7.53	0.206725	26	3	25617	2269	2010	6798	260	28803	0.333775
47	0.11704	0.00336	5.81827	0.63647	0.35317	0.00771	0.199566	1911.5	50.64	1949.1	94.78	1949.7	36.72	-1.99843	0	0	3823	434	225	221	26	3066	1.9638
48	0.11227	0.00155	4.9089	0.19146	0.31959	0.00285	0.228643	1836.5	24.86	1803.8	32.9	1787.7	13.91	2.65723	28	1	10591	1154	571	1235	84	9390	0.934413
49	0.11229	0.00112	5.20042	0.12343	0.3228	0.00175	0.228414	1836.7	18.03	1852.7	20.21	1803.4	8.55	1.81303	0	0	44249	4822	2381	6852	332	38844	0.703736
50	0.11053	0.00225	5.37581	0.35502	0.34047	0.00484	0.215257	1808.2	36.53	1881	56.54	1888.9	23.28	-4.463	17	0	11194	1200	3821	9631	80	9318	0.124598
51	0.11927	0.00156	5.65021	0.21741	0.34081	0.00292	0.222667	1945.4	23.22	1923.8	33.2	1890.6	14.02	2.8169	8	7	12097	1399	2917	7329	88	10064	0.190886
52	0.12116	0.0013	5.30225	0.13995	0.33296	0.00206	0.234403	1973.3	18.96	1869.2	22.55	1852.7	9.98	6.11159	0	0	43135	5069	4761	13056	343	36739	0.388251
53	0.11134	0.00162	4.85025	0.20572	0.32257	0.00307	0.224389	1821.4	26.23	1793.7	35.71	1802.3	14.97	1.04864	1	4	10791	1165	1149	2648	86	9488	0.439955
54	0.12193	0.00215	5.4452	0.30378	0.36141	0.00457	0.226658	1984.6	31.04	1892	47.86	1988.9	21.66	-0.216668	44	18	11539	1364	1277	3040	89	9057	0.448684
55	0.1138	0.00204	6.11759	0.39685	0.3552	0.00451	0.19573	1860.9	31.99	1992.8	56.61	1959.4	21.45	-5.29314	17	0	9711	1071	2449	6713	62	7759	0.159541
56	0.13038	0.00315	5.6189	0.5102	0.36136	0.00684	0.208462	2103.1	41.85	1919	78.27	1988.6	32.39	5.44434	24	6	3913	494	2480	6127	31	3074	0.0806267
57	0.12321	0.00196	6.09678	0.31002	0.35924	0.00398	0.217876	2003.2	28.01	1989.8	44.36	1978.6	18.89	1.22804	11	6	13573	1621	5487	13486	95	10726	0.120199
58	0.11331	0.00195	5.11057	0.27135	0.33509	0.00399	0.22426	1853.2	30.82	1837.9	45.09	1863	19.26	-0.528815	0	0	7455	818	1009	2577	57	6317	0.317423
59	0.13091	0.00496	6.263	0.86865	0.38931	0.01187	0.219833	2110.2	65.06	2013.3	121.44	2119.6	55.1	-0.445455	7	18	6522	827	1083	2713	47	4757	0.304829
03ADb14
1	0.12008	0.00108	6.26395	0.16717	0.36982	0.00212	0.214801	1957.4	15.96	2013.4	23.37	2028.5	9.99	-3.63237	0	7	44388	5201	5073	12712	301	36723	0.409141
2	0.11573	0.00173	5.27691	0.25391	0.34215	0.00357	0.216846	1891.3	26.6	1865.1	41.07	1897	17.13	-0.30138	12	0	10130	1144	3505	9237	78	9057	0.12385
3	0.1446	0.00112	8.49632	0.19793	0.41891	0.0021	0.215188	2283	13.32	2285.5	21.16	2255.5	9.52	1.20456	24	10	40376	5697	9284	20384	243	29475	0.279484
4	0.1141	0.00101	4.93937	0.11759	0.32287	0.00174	0.226372	1865.7	15.94	1809	20.1	1803.7	8.47	3.32315	23	0	31028	3455	7663	25798	254	29381	0.133925
5	0.10971	0.00076	4.7259	0.06998	0.3161	0.00112	0.239279	1794.6	12.62	1771.8	12.41	1770.7	5.5	1.33177	0	15	88005	9423	5114	14470	725	85077	0.651209
6	0.11856	0.00083	5.53332	0.08761	0.34386	0.00128	0.235104	1934.6	12.5	1905.8	13.62	1905.2	6.15	1.51969	49	0	79521	9202	13889	37965	604	70653	0.242381
7	0.16629	0.00238	12.123	0.77102	0.48799	0.00604	0.194612	2520.6	23.88	2614	59.66	2562	26.15	-1.64247	27	0	33462	5431	5759	12283	162	20944	0.442156
8	0.11524	0.00157	5.56046	0.24518	0.35211	0.00331	0.213194	1883.6	24.31	1910	37.95	1944.7	15.79	-3.24379	38	0	14638	1646	5695	15294	107	12695	0.107624
9	0.17963	0.00136	12.7931	0.31981	0.51495	0.00269	0.208964	2649.4	12.49	2664.5	23.54	2677.7	11.45	-1.06817	6	0	52079	9132	5371	9507	259	30875	0.960555
10	0.11483	0.00155	5.1449	0.21969	0.33199	0.00304	0.214445	1877.3	24.11	1843.6	36.3	1848	14.72	1.56075	0	10	9284	1040	3013	7986	73	8533	0.130228
11	0.11482	0.00133	5.23055	0.18271	0.33435	0.00257	0.220048	1877.1	20.73	1857.6	29.78	1859.4	12.43	0.942944	0	0	15921	1784	3470	9172	124	14527	0.194505
12	0.11244	0.00113	5.33206	0.15822	0.33536	0.00212	0.213039	1839.2	18.07	1874	25.37	1864.3	10.23	-1.36472	0	4	24127	2648	3234	23053	180	21943	0.114866
13	0.10837	0.00085	4.69625	0.0865	0.32104	0.00138	0.233375	1772.1	14.26	1766.6	15.42	1794.8	6.73	-1.28097	28	0	52099	5512	7396	21297	427	49483	0.258816
14	0.11738	0.00274	6.12441	0.57104	0.36521	0.00637	0.187066	1916.7	41.26	1993.7	81.39	2006.8	30.06	-4.70079	0	14	3701	424	3197	8181	25	3089	0.0518274
15	0.11248	0.00096	5.08078	0.11323	0.32759	0.00163	0.223268	1839.9	15.43	1832.9	18.91	1826.7	7.92	0.71743	11	13	36667	4027	19337	52531	288	34104	0.0766595
16	0.1601	0.00145	10.0726	0.31241	0.47278	0.00311	0.21209	2456.7	15.25	2441.5	28.65	2495.8	13.61	-1.59157	0	0	27026	4225	7952	17144	152	17413	0.246442
17	0.10823	0.00091	4.92196	0.10288	0.32586	0.00154	0.226098	1769.8	15.22	1806	17.64	1818.3	7.48	-2.74042	0	11	41870	4425	5091	14226	327	39132	0.31105
18	0.18064	0.00124	12.9512	0.22792	0.52009	0.00203	0.221791	2658.8	11.33	2676.1	16.59	2699.6	8.62	-1.53453	0	6	94854	16735	13494	27071	470	55530	0.618189
19	0.10716	0.00136	4.76673	0.17833	0.3237	0.00265	0.218826	1751.7	23.03	1779.1	31.4	1807.8	12.91	-3.2026	0	0	28665	3000	7301	20265	229	26956	0.148038
20	0.12097	0.00104	5.49452	0.12285	0.33636	0.0017	0.226047	1970.6	15.2	1899.7	19.21	1869.2	8.2	5.14564	0	28	36312	4290	8343	24030	284	32845	0.178527
21	0.10991	0.00103	5.00824	0.12653	0.32809	0.00183	0.220775	1797.8	16.98	1820.7	21.38	1829.1	8.86	-1.74102	12	5	28227	3030	2070	7398	220	26170	0.40957
22	0.11373	0.00103	5.00001	0.11666	0.32308	0.00172	0.228175	1859.9	16.29	1819.3	19.74	1804.8	8.37	2.96252	0	0	34949	3883	4501	14989	282	32896	0.259057
23	0.16797	0.00143	12.0686	0.35097	0.49142	0.00289	0.202223	2537.6	14.16	2609.7	27.27	2576.8	12.49	-1.54477	1	11	34858	5720	5626	10837	172	21566	0.527821
24	0.11087	0.00424	5.44617	0.73459	0.35711	0.00997	0.206985	1813.7	67.84	1892.2	115.71	1968.4	47.37	-8.52953	48	0	4482	485	2027	5233	32	3815	0.0926811
25	0.11338	0.00111	5.18302	0.13609	0.33785	0.00199	0.224329	1854.3	17.6	1849.8	22.35	1876.3	9.6	-1.18643	0	0	34026	3770	9692	25781	265	30576	0.146232
26	0.10758	0.00095	4.401	0.09003	0.30319	0.00146	0.235398	1758.8	15.98	1712.5	16.93	1707.1	7.22	2.9395	44	10	168080	17670	36517	119098	1463	168263	0.148365
27	0.1196	0.00108	4.87144	0.10567	0.31377	0.00161	0.236548	1950.2	15.98	1797.3	18.27	1759.2	7.89	9.79387	0	26	87414	10217	13361	54746	764	84538	0.186626
28	0.11408	0.00147	5.50461	0.22096	0.34874	0.00297	0.212162	1865.4	23.07	1901.3	34.49	1928.6	14.19	-3.38801	0	4	18754	2091	1587	4241	138	16315	0.493044
29	0.12087	0.00105	6.00589	0.13073	0.36296	0.0018	0.227833	1969.1	15.41	1976.7	18.95	1996.2	8.51	-1.37626	10	15	57562	6800	13630	35574	412	48101	0.191151
30	0.11235	0.00208	5.8197	0.36025	0.36161	0.00471	0.210415	1837.7	33.23	1949.3	53.64	1989.8	22.31	-8.27665	3	7	12144	1333	1907	4879	83	10181	0.273212
31	0.20053	0.00189	15.197	0.55026	0.55173	0.00398	0.199226	2830.5	15.29	2827.7	34.5	2832.3	16.54	-0.063593	8	10	29061	5696	4845	8252	136	15964	0.690257
32	0.11278	0.00111	5.37853	0.14203	0.34011	0.00196	0.218233	1844.7	17.67	1881.4	22.61	1887.2	9.43	-2.3039	18	0	27562	3038	6492	17667	205	24555	0.171959
33	0.10675	0.00113	4.53471	0.12327	0.31891	0.00199	0.22955	1744.7	19.29	1737.4	22.62	1784.4	9.71	-2.27546	15	25	42818	4468	5068	14121	359	40673	0.316408
34	0.07299	0.00082	1.91481	0.04161	0.1826	0.00098	0.246975	1013.7	22.65	1086.3	14.5	1081.2	5.32	-6.65877	25	0	25560	1824	4451	21310	347	42373	0.0855936
35	0.11045	0.00102	5.05285	0.11084	0.33071	0.00167	0.230202	1806.8	16.73	1828.2	18.59	1841.8	8.11	-1.93713	0	26	39817	4300	7105	20108	310	36437	0.213845
36	0.10824	0.00088	4.73663	0.07347	0.3214	0.00124	0.248734	1769.9	14.79	1773.7	13	1796.6	6.06	-1.50856	0	0	111440	11794	10679	30640	908	104909	0.384922
37	0.10888	0.00203	5.2324	0.31542	0.33693	0.00429	0.211217	1780.8	33.72	1857.9	51.39	1871.9	20.7	-5.11568	0	0	13955	1485	2589	6986	103	12529	0.212568
38	0.10728	0.00116	4.98726	0.14187	0.3227	0.00205	0.223319	1753.8	19.66	1817.2	24.06	1802.9	9.99	-2.79964	13	0	21868	2294	4523	13227	167	20494	0.173433
39	0.10713	0.00115	4.5327	0.11921	0.30786	0.00188	0.232193	1751.2	19.39	1737	21.88	1730.2	9.28	1.19918	10	1	22853	2394	5697	17540	192	22438	0.136488
40	0.17722	0.0034	12.5173	1.07743	0.50969	0.00893	0.203547	2627	31.56	2644	80.93	2655.3	38.12	-1.07727	5	0	10617	1840	2627	4557	53	6295	0.403774
41	0.11485	0.00136	5.2222	0.17101	0.33764	0.00247	0.223396	1877.6	21.26	1856.2	27.91	1875.3	11.92	0.122497	42	2	36782	4132	2106	5205	288	32913	0.793852
42	0.11572	0.00127	5.39345	0.15869	0.34042	0.00223	0.222642	1891.1	19.56	1883.8	25.2	1888.7	10.71	0.12691	0	0	23584	2669	1395	3510	180	20926	0.760399
43	0.10758	0.001	4.54155	0.08945	0.30971	0.00147	0.240983	1758.8	16.82	1738.6	16.39	1739.3	7.22	1.10871	23	0	49311	5189	13917	40258	416	48082	0.128894
44	0.06483	0.0015	1.10262	0.04461	0.12988	0.00137	0.260719	768.8	47.99	754.6	21.54	787.2	7.84	-2.39334	0	0	4796	304	658	4423	100	11148	0.0687316
45	0.11787	0.00119	5.46038	0.13297	0.34024	0.00192	0.231731	1924.2	17.99	1894.4	20.9	1887.8	9.22	1.8917	0	12	88055	10154	9541	28107	678	78099	0.361262
46	0.14443	0.00139	8.02107	0.19924	0.40949	0.0023	0.226121	2280.9	16.51	2233.4	22.43	2212.6	10.54	2.99443	24	5	36236	5120	6734	15739	233	26697	0.325307
47	0.18324	0.00469	15.5713	2.04695	0.56581	0.01428	0.191988	2682.4	41.73	2850.9	125.42	2890.6	58.78	-7.76171	0	0	6424	1151	2991	4872	27	3424	0.236248
48	0.11563	0.00137	4.75912	0.14357	0.30343	0.00211	0.230508	1889.7	21.14	1777.7	25.31	1708.3	10.44	9.59941	14	40	151735	17166	9878	63261	1316	150795	0.271352
49	0.12272	0.00126	5.48728	0.13336	0.33803	0.00193	0.234927	1996.2	18.16	1898.6	20.87	1877.2	9.3	5.96133	10	7	30576	3671	5801	19183	244	27264	0.191367
50	0.1718	0.00164	11.3155	0.28819	0.4872	0.00277	0.223238	2575.3	15.89	2549.5	23.76	2558.6	11.99	0.648468	0	20	40256	6767	6063	11998	218	24898	0.564011
51	0.10931	0.00268	5.27056	0.42752	0.34189	0.00584	0.210585	1788	44.1	1864.1	69.23	1895.8	28.04	-6.02908	20	14	9860	1054	2829	7517	73	8688	0.140216
52	0.11173	0.00176	5.17141	0.23983	0.33062	0.00337	0.219789	1827.8	28.29	1847.9	39.46	1841.4	16.34	-0.744064	7	0	21049	2301	2874	8213	162	19175	0.280166
53	0.1144	0.00113	5.27146	0.11203	0.33976	0.00173	0.239591	1870.4	17.76	1864.3	18.14	1885.5	8.31	-0.807314	27	0	66661	7463	13546	37159	517	59080	0.20084
54	0.10677	0.0013	4.60269	0.13866	0.31987	0.00222	0.230377	1745.1	22.02	1749.8	25.13	1789.1	10.86	-2.52135	0	0	28271	2954	3931	10650	234	26602	0.277371
55	0.1148	0.00194	5.96069	0.35638	0.36156	0.00413	0.191053	1876.7	30.19	1970.1	51.99	1989.6	19.53	-6.01588	21	0	8925	1003	4933	12568	61	7428	0.0798059
56	0.18796	0.00399	12.7179	1.18931	0.52049	0.0103	0.211615	2724.4	34.53	2659	88.03	2701.3	43.65	0.847893	0	11	9296	1710	1219	2597	49	5373	0.658452
57	0.17065	0.00172	11.788	0.32086	0.49133	0.00292	0.218339	2564.1	16.78	2587.7	25.48	2576.4	12.61	-0.4797	22	0	50323	8406	6732	12985	260	30804	0.647362
58	0.10732	0.00148	5.03594	0.19079	0.33211	0.00277	0.220152	1754.5	24.99	1825.4	32.1	1848.6	13.4	-5.36335	0	12	38365	4030	3202	9054	292	34735	0.445107
59	0.1706	0.00169	11.3393	0.27309	0.4742	0.00257	0.225036	2563.6	16.51	2551.4	22.47	2501.9	11.24	2.40677	27	0	73331	12248	14027	27011	394	46476	0.453445
60	0.11472	0.00172	5.60372	0.25088	0.34999	0.00335	0.213796	1875.5	26.75	1916.7	38.58	1934.5	15.98	-3.14583	7	0	21666	2433	1750	4374	158	18600	0.556241
61	0.11461	0.00241	5.1004	0.35137	0.32816	0.00475	0.21011	1873.8	37.44	1836.2	58.48	1829.5	23.05	2.36418	38	20	6664	747	1520	4121	53	6100	0.181267
62	0.10926	0.0018	4.93799	0.23428	0.33002	0.00346	0.220979	1787.1	29.83	1808.8	40.06	1838.5	16.76	-2.87617	12	9	38526	4121	4541	12165	305	35059	0.338759
63	0.11246	0.00204	4.83974	0.25546	0.32711	0.0039	0.225876	1839.6	32.54	1791.8	44.42	1824.4	18.95	0.826267	0	20	10768	1185	2578	7210	89	9883	0.164355

## Sheet: Table DR4
Dusel-Bacon, C., Holm-Denoma, C.S., Jones, J.V., III, Aleinikoff, J.N., and Mortensen, J.K., 2017, Detrital zircon geochronology of quartzose metasedimentary rocks from parautochthonous North America, east-central Alaska: Lithosphere, doi:10.1130/L672.1.
GSA Data Repository Item 2017332
GSA Data Repository Table DR4. SHRIMP U-Th-Pb analyses of detrital zircons from metasedimentary rocks, east-central Alaska, by J.N. Aleinikoff.
sample1	measured	measured	% common	U (ppm)	Th/U	206Pb/238U2	err3	207Pb/206Pb2	err3	% disc.	207Pb/235U4	err (%)3	206Pb/238U4	err (%)3	rho
	204Pb/206Pb	207Pb/206Pb	206Pb			Ma		Ma
03ADb14-1.1	-4.8e-05	0.1739	-0.07	102	0.67	2430.9	28.5	2601	17	7	11.02	1.7	0.458	1.4	0.809
03ADb14-2.1	---	0.1917	0	79	0.98	2757.7	33.2	2757	16	0	14.11	1.8	0.5339	1.5	0.837
03ADb14-3.1	---	0.1117	0	276	0.53	1846.9	17.3	1827	15	-1	5.11	1.4	0.3318	1.1	0.795
03ADb14-4.1	0.000134	0.1233	0.21	283	0.54	1909.5	17.9	1979	19	4	5.78	1.5	0.3447	1.1	0.718
03ADb14-5.1	---	0.108	0	311	0.77	1548.5	14.5	1766	16	12	4.04	1.4	0.2715	1.1	0.773
03ADb14-6.1	---	0.1778	0	169	0.35	2654.1	25.8	2633	12	-1	12.49	1.4	0.5094	1.2	0.855
03ADb14-7.1	0.013604	0.3116	23.89	1311	1.95	721.6	18.6	2117	214	66	2.15	12.5	0.1184	2.7	0.218
03ADb14-8.1	2e-05	0.1455	0.03	451	0.52	2151.8	18	2291	9	6	7.94	1.1	0.3963	1	0.882
03ADb14-9.1	-3e-05	0.1118	-0.05	182	0.24	1861.2	18.7	1835	18	-1	5.18	1.5	0.3347	1.2	0.757
03ADb14-10.1	7.5e-05	0.1133	0.12	124	0.29	1876.4	21	1836	23	-2	5.23	1.8	0.3379	1.3	0.71
03ADb14-11.1	---	0.1299	0	111	0.54	2100.2	23.4	2097	19	0	6.9	1.7	0.3851	1.3	0.772
03ADb14-12.1	0.000218	0.1125	0.34	50	1.02	1826.3	27.6	1792	44	-2	4.95	3	0.3275	1.7	0.58
03ADb14-13.1	---	0.1087	0	122	0.78	1803	20.1	1778	22	-1	4.84	1.8	0.3227	1.3	0.724
03ADb14-14.1	0.000763	0.0936	1.37	3062	0.69	486.3	4.2	1266	25	62	0.9	1.6	0.0783	0.9	0.567
03ADb14-15.1	0.001502	0.152	2.4	304	1.47	1585.2	15.2	2126	149	25	5.08	8.6	0.2788	1.1	0.126
03ADb14-16.1	---	0.1367	0	186	0.29	2167.7	20.9	2186	14	1	7.53	1.4	0.3997	1.1	0.818
03ADb14-17.1	---	0.1939	0	83	0.64	2811.8	31.6	2776	14	-1	14.62	1.6	0.5468	1.4	0.852
03ADb14-18.1	---	0.155	0	137	0.46	2363	24	2402	14	2	9.46	1.5	0.4428	1.2	0.83
03ADb14-19.1	1.2e-05	0.1095	0.02	333	0.62	1768.5	15.8	1789	16	1	4.76	1.3	0.3157	1	0.765
03ADb14-20.1	2.1e-05	0.1103	0.03	178	0.46	1831.9	18.3	1800	18	-2	4.99	1.5	0.3287	1.1	0.764
03ADb14-21.1	---	0.1833	0	86	0.51	2707.6	30.2	2683	15	-1	13.19	1.7	0.522	1.4	0.826
03ADb14-22.1	---	0.1133	0	251	0.08	1907.4	17.7	1853	14	-3	5.38	1.3	0.3443	1.1	0.807
03ADb14-23.1	0.000144	0.108	0.23	129	2.63	1548	17.3	1732	27	11	3.97	1.9	0.2714	1.3	0.646
03ADb14-24.1	0.000189	0.1103	0.3	278	0.6	1598.6	15	1761	20	9	4.18	1.5	0.2814	1.1	0.696
03ADb14-25.1	-2.9e-05	0.1138	-0.05	64	1.93	1832.7	24.5	1868	28	2	5.18	2.2	0.3288	1.5	0.699
03ADb14-26.1	-1.7e-05	0.1768	-0.02	200	0.49	2618.7	23.6	2625	10	0	12.23	1.2	0.5012	1.1	0.88
03ADb14-27.1	4.5e-05	0.1083	0.07	240	0.44	1774.4	16.7	1760	17	-1	4.7	1.4	0.3169	1.1	0.764
03ADb14-28.1	-3.2e-05	0.1785	-0.04	112	0.31	2640.2	27.4	2643	14	0	12.48	1.5	0.5061	1.3	0.838
03ADb14-29.1	---	0.181	0	136	0.76	2642.9	26.1	2662	12	1	12.65	1.4	0.5068	1.2	0.856
03ADb14-30.1	2.3e-05	0.1089	0.04	298	0.31	1817.9	16.3	1777	14	-2	4.88	1.3	0.3258	1	0.808
03ADb14-31.1	---	0.108	0	69	0.43	1826.4	23.4	1766	27	-3	4.88	2.1	0.3275	1.5	0.704
03ADb14-32.1	3e-05	0.1473	0.04	224	0.41	2392.5	21.5	2310	11	-4	9.1	1.3	0.4494	1.1	0.854
03ADb14-33.1	8.7e-05	0.1084	0.13	95	0.47	1815.9	21.2	1752	26	-4	4.81	2	0.3254	1.3	0.684
03ADb14-34.1	-0.000262	0.1746	-0.37	27	0.54	2570.4	44.1	2632	34	2	12.01	2.9	0.4899	2.1	0.712
03ADb14-35.1	8.4e-05	0.1829	0.11	51	0.42	2762	36.3	2670	20	-3	13.41	2	0.5349	1.6	0.808
03ADb14-36.1	3.6e-05	0.1163	0.06	91	0.74	1844.3	21.7	1892	26	3	5.29	2	0.3312	1.4	0.685
03ADb14-37.1	---	0.1126	0	40	0.56	1874.1	29.3	1841	36	-2	5.24	2.7	0.3374	1.8	0.672
03ADb14-38.1	---	0.1209	0	105	0.87	2004.7	22.4	1969	20	-2	6.08	1.7	0.3648	1.3	0.754
03ADb14-39.1	-0.000111	0.1106	-0.17	46	2.16	1833.2	27.6	1834	38	0	5.09	2.7	0.3289	1.7	0.634
03ADb14-40.1	6.2e-05	0.1798	0.09	82	0.32	2641.3	29.9	2644	16	0	12.5	1.7	0.5064	1.4	0.821
03ADb14-41.1	---	0.1144	0	42	0.58	1877	28.8	1870	34	0	5.33	2.6	0.338	1.8	0.688
03ADb14-42.1	---	0.1031	0	138	0.63	1697.6	18	1680	21	-1	4.28	1.7	0.3013	1.2	0.731
03ADb14-43.1	---	0.1489	0	185	0.46	2357.5	22.1	2333	12	-1	9.06	1.3	0.4415	1.1	0.85
03ADb14-44.1	4.4e-05	0.116	0.07	216	0.27	1929.2	18.1	1887	20	-2	5.55	1.6	0.3489	1.1	0.693
03ADb14-45.1	---	0.1151	0	61	0.63	1935.7	25.7	1882	27	-3	5.56	2.2	0.3502	1.5	0.71
03ADb14-46.1	---	0.1084	0	54	0.95	1812.4	25.5	1773	32	-2	4.85	2.4	0.3246	1.6	0.682
03ADb14-47.1	5e-05	0.1477	0.07	126	0.64	2352.8	23.9	2312	15	-2	8.93	1.5	0.4405	1.2	0.816
03ADb14-48.1	-6.7e-05	0.1741	-0.09	77	0.48	2598.6	29.8	2605	17	0	11.97	1.7	0.4965	1.4	0.812
03ADb14-49.1	2.1e-05	0.172	0.03	107	0.51	2619.8	27	2574	13	-2	11.87	1.5	0.5014	1.3	0.843
03ADb14-50.1	5.8e-05	0.1211	0.09	71	0.39	1998.5	24.6	1961	25	-2	6.03	2	0.3635	1.4	0.718
03ADb14-51.1	1e-05	0.1792	0.01	721	0.05	2634.5	19.8	2644	5	0	12.46	1	0.5048	0.9	0.949
03ADb14-52.1	0.006823	0.1962	11.25	90	7.3	1333.1	25.8	1667	350	20	3.24	19	0.2297	2.1	0.112
03ADb14-53.1	6.9e-05	0.1071	0.11	103	0.47	1754.2	19.8	1734	25	-1	4.58	1.9	0.3128	1.3	0.695
03ADb14-54.1	---	0.1469	0	142	0.84	2311.5	23.3	2310	14	0	8.74	1.5	0.4313	1.2	0.82
04ADb01B-1.1	0.000181	0.1084	0.32	355	0.25	674.4	7.2	1730	30	61	1.61	2	0.1103	1.1	0.561
04ADb01B-2.1	---	0.1121	0	60	1.02	1851.1	28.3	1833	34	-1	5.14	2.6	0.3326	1.8	0.679
04ADb01B-3.1	0.000414	0.1203	0.73	1315	0.43	699.7	6.5	1875	24	63	1.81	1.7	0.1146	1	0.593
04ADb01B-4.1	---	0.1998	0	69	0.38	2616.7	36.6	2824	19	7	13.79	2.1	0.5007	1.7	0.824
04ADb01B-5.1	0.000169	0.1838	0.27	159	0.35	1548.9	17.9	2669	19	42	6.81	1.7	0.2716	1.3	0.758
04ADb01B-6.1	0.000154	0.1148	0.24	87	0.44	1873.1	25.9	1844	34	-2	5.24	2.5	0.3372	1.6	0.645
04ADb01B-7.1	-2.8e-05	0.1107	-0.04	114	0.76	1764.6	22.1	1817	26	3	4.82	2	0.3149	1.4	0.705
04ADb01B-8.1	---	0.1141	0	55	1.07	1957.1	31	1866	34	-5	5.58	2.6	0.3547	1.8	0.693
04ADb01B-9.1	2.1e-05	0.147	0.03	178	0.56	2369.2	24.1	2309	14	-3	8.99	1.5	0.4442	1.2	0.826
04ADb01B-10.1	2.3e-05	0.1488	0.03	337	0.73	2129.3	19	2328	11	9	8.01	1.2	0.3914	1	0.854
04ADb01B-11.1	4.3e-05	0.1482	0.06	67	1.2	2288.8	31.9	2319	43	1	8.68	3	0.4263	1.7	0.553
04ADb01B-12.1	3.4e-05	0.1071	0.06	513	0.34	1410.2	12.7	1743	15	19	3.6	1.3	0.2445	1	0.784
04ADb01B-13.1	2e-05	0.1129	0.03	234	0.4	1788.8	17.9	1842	17	3	4.97	1.5	0.3198	1.1	0.769
04ADb01B-14.1	4.4e-05	0.1592	0.06	80	1.22	2413	31.4	2441	21	1	9.93	2	0.454	1.6	0.788
04ADb01B-15.1	---	0.1741	0	157	0.44	2619.8	26.9	2598	13	-1	12.04	1.5	0.5014	1.3	0.85
04ADb01B-16.1	---	0.1072	0	178	0.3	1598.7	17.5	1753	22	9	4.16	1.7	0.2815	1.2	0.723
04ADb01B-17.1	0.000112	0.1166	0.17	65	1.07	1806.9	26.2	1882	35	4	5.14	2.5	0.3235	1.7	0.653
04ADb01B-18.1	---	0.1126	0	143	0.35	1826.1	20.4	1842	21	1	5.08	1.7	0.3275	1.3	0.737
04ADb01B-19.1	---	0.1884	0	66	0.35	2690.9	33.3	2728	17	1	13.46	1.8	0.518	1.5	0.827
04ADb01B-20.1	---	0.1156	0	71	0.8	1919.1	25	1889	27	-2	5.53	2.1	0.3468	1.5	0.712
04ADb01B-21.1	---	0.1211	0	161	0.57	1974.6	20.2	1972	17	0	5.98	1.5	0.3584	1.2	0.784
04ADb01B-22.1	-2.9e-05	0.1146	-0.04	199	0.31	1889.8	18.7	1879	18	-1	5.4	1.5	0.3406	1.1	0.747
04ADb01B-23.1	3.1e-05	0.116	0.05	120	0.28	1891.1	21.2	1889	21	0	5.43	1.8	0.3409	1.3	0.736
04ADb01B-24.1	0.000128	0.1583	0.2	374	0.44	1651.3	14.8	2420	12	32	6.31	1.2	0.292	1	0.832
04ADb01B-25.1	---	0.1126	0	299	0.58	1455.1	13.6	1842	15	21	3.93	1.3	0.2532	1	0.782
04ADb01B-26.1	3.6e-05	0.1933	0.05	258	0.93	2135.8	18.5	2767	9	23	10.45	1.1	0.3928	1	0.89
04ADb01B-27.1	1.8e-05	0.1854	0.02	100	0.9	2700.7	26.7	2700	12	0	13.29	1.4	0.5204	1.2	0.859
04ADb01B-28.1	0.000199	0.1211	0.33	87	0.43	1265.2	16.9	1932	37	35	3.54	2.5	0.2169	1.5	0.584
04ADb01B-29.1	-8e-06	0.1148	-0.01	50	0.82	1969.2	29.2	1878	32	-5	5.66	2.5	0.3573	1.7	0.701
04ADb01B-30.1	0.000912	0.1284	1.4	194	0.54	1884.7	18.9	1897	33	1	5.44	2.1	0.3396	1.2	0.539
04ADb01B-31.1	3.1e-05	0.2097	0.04	72	0.64	2935.2	34.9	2900	15	-1	16.64	1.7	0.5767	1.5	0.855
04ADb01B-32.1	-1.1e-05	0.1224	-0.02	188	0.47	1984.3	19.6	1994	16	0	6.09	1.5	0.3605	1.1	0.788
04ADb01B-33.1	-0.000169	0.1224	-0.26	55	0.67	2036.2	28.9	2024	34	-1	6.39	2.5	0.3715	1.7	0.649
04ADb01B-34.1	2.5e-05	0.1224	0.04	402	0.82	1956.8	16.7	1986	14	1	5.97	1.3	0.3547	1	0.785
04ADb01B-35.1	7.8e-05	0.1184	0.12	50	1.58	1898	27.9	1916	33	1	5.54	2.5	0.3424	1.7	0.682
04ADb01B-36.1	5.1e-05	0.1174	0.08	69	0.99	1841.8	24.3	1906	28	3	5.32	2.2	0.3307	1.5	0.699
04ADb01B-37.1	4.3e-05	0.1103	0.07	85	0.71	1786.9	22.3	1794	27	0	4.83	2	0.3194	1.4	0.698
04ADb01B-38.1	-4.7e-05	0.113	-0.07	77	0.79	1871.5	23.7	1859	28	-1	5.28	2.1	0.3368	1.5	0.692
04ADb01B-39.1	---	0.1461	0	162	0.79	2361.4	24.1	2301	20	-3	8.91	1.7	0.4424	1.2	0.721
04ADb01B-40.1	7.7e-05	0.0916	0.13	139	0.54	1502.7	17.5	1436	31	-5	3.27	2.1	0.2625	1.3	0.629
04ADb01B-41.1	1.8e-05	0.1654	0.02	160	0.54	2608.6	26.2	2509	13	-4	11.36	1.4	0.4988	1.2	0.848
04ADb01B-42.1	---	0.1072	0	221	0.31	1880	18.9	1753	18	-7	5.01	1.5	0.3386	1.2	0.76
04ADb01B-43.1	2.7e-05	0.1086	0.04	166	0.8	1898.9	20.3	1770	20	-7	5.11	1.7	0.3425	1.2	0.74
04ADb01B-44.1	0.00014	0.1069	0.24	709	0.25	875.1	7.9	1714	17	49	2.11	1.3	0.1454	1	0.721
04ADb01B-45.1	2.4e-05	0.1648	0.03	155	0.52	2572.5	25.9	2503	13	-3	11.13	1.4	0.4904	1.2	0.846
04ADb01B-46.1	---	0.1186	0	63	0.98	1936.4	27.7	1934	30	0	5.73	2.3	0.3504	1.7	0.708
04ADb01B-47.1	---	0.1694	0	303	0.38	2279	20.2	2552	10	11	9.91	1.2	0.4241	1.1	0.879
04ADb01B-48.1	---	0.1892	0	215	0.77	2766.7	25.4	2735	10	-1	13.98	1.3	0.536	1.1	0.882
04ADb01B-49.1	4.5e-05	0.138	0.07	149	0.41	2233.2	23.5	2195	17	-2	7.85	1.6	0.414	1.2	0.793
04ADb01B-50.1	0.000111	0.1434	0.16	41	0.4	2297.5	37	2251	31	-2	8.38	2.6	0.4282	1.9	0.725
04ADb01B-51.1	---	0.1033	0	52	1.34	1680.7	26.6	1685	39	0	4.24	2.8	0.2979	1.8	0.653
04ADb01B-52.1	---	0.1709	0	193	0.52	2416.3	23.1	2566	18	6	10.71	1.6	0.4547	1.1	0.726
04ADb01B-53.1	2.9e-05	0.1291	0.04	116	0.84	2165	24.4	2081	19	-4	7.09	1.7	0.3991	1.3	0.771
04ADb01B-54.1	1.7e-05	0.1239	0.03	212	0.41	2082.8	20.2	2009	15	-4	6.5	1.4	0.3814	1.1	0.804
04ADb01B-55.1	1.3e-05	0.1617	0.02	219	0.41	2506.4	23.2	2472	11	-1	10.59	1.3	0.4752	1.1	0.86
04ADb01B-56.1	---	0.1213	0	207	0.38	1987	19.3	1976	15	-1	6.04	1.4	0.361	1.1	0.8
04ADb01B-57.1	3.6e-05	0.3314	0.04	106	0.23	3749.8	37.1	3622	32	-4	36.01	2.5	0.7891	1.3	0.529
04ADb01B-58.1	0.003053	0.1017	5.34	33	0.7	765.4	21.1	504	569	-52	1	26	0.1261	2.9	0.112
04ADb01B-59.1	2e-05	0.1243	0.03	182	0.36	2018.3	20.3	2015	16	0	6.29	1.5	0.3676	1.2	0.788
04ADb01B-60.1	0.00012	0.1051	0.2	588	0.36	1011.4	9	1686	16	40	2.42	1.3	0.1699	1	0.744
1 All samples analyzed on Stanford–USGS sensitive high resolution ion microprobe–reverse geometry (SHRIMP-RG), Stanford University, California.
2 206Pb/238U and 207Pb/206Pb ages corrected for common Pb using the 204Pb-correction method. Decay constants from Steiger and Jäger (1977).
3 1-sigma errors.
4 Radiogenic ratios, corrected for common Pb using the 204Pb-correction method, based on the Stacey and Kramers (1975) model.
Gray shaded rows represent discordant data not included in Relative Probability plots.

## Sheet: Table DR5
Dusel-Bacon, C., Holm-Denoma, C.S., Jones, J.V., III, Aleinikoff, J.N., and Mortensen, J.K., 2017, Detrital zircon geochronology of quartzose metasedimentary rocks from parautochthonous North America, east-central Alaska: Lithosphere, doi:10.1130/L672.1.
GSA Data Repository Item 2017332
Table DR5
SAMPLE 96ADb25a			Isotopic Ratios					Apparent Isotopic Dates (Ma)						Final Dates (Ma)
Analysis#	AnalysisID	Analysis_Batch	207Pb /235U	2-sig abs (propagated)*	206Pb /238U	2-sig abs (propagated)*	Rho	Age 206Pb /238U	1-sig (abs)^	Age 207Pb /235U	1-sig (abs)^	Age 207Pb /206Pb	1-sig (abs)^	% DISCORDANT	Best age	1-sig (abs)^
96ADb25a-83	Output_1_3	6722_TRA_Analysis.csv	1.41	0.11	0.0797	0.0028	0.73752	494	8.5	892	23	2041	17.5	75.7962	494	8.5
96ADb25a-48	Output_1_8	6721_TRA_Analysis.csv	1.312	0.038	0.1065	0.003	0.99494	652	8.5	851	8	1422	15	54.1491	652	8.5
96ADb25a-39	Output_1_39	6720_TRA_Analysis.csv	1.454	0.068	0.1123	0.0044	0.78531	686	13	911	14	1515	18	54.7195	686	13
96ADb25a-23	Output_1_23	6720_TRA_Analysis.csv	1.918	0.079	0.1143	0.0042	0.8515	698	12	1087	14	1958	13.5	64.3514	698	12
96ADb25a-114	Output_1_34	6722_TRA_Analysis.csv	1.446	0.11	0.1245	0.0043	0.89753	756	12.5	908	23.5	1317	13	42.5968	756	12.5
96ADb25a-60	Output_1_20	6721_TRA_Analysis.csv	1.62	0.12	0.1276	0.0053	0.97779	774	15	970	23.5	1423	30	45.6079	774	15
96ADb25a-6	Output_1_6	6720_TRA_Analysis.csv	1.739	0.072	0.1363	0.0045	0.77948	824	13	1023	13.5	1450	12	43.1724	824	13
96ADb25a-53	Output_1_13	6721_TRA_Analysis.csv	2.36	0.11	0.1768	0.0073	0.92275	1049	20	1227	17	1576	16.5	33.4391	1049	20
96ADb25a-28	Output_1_28	6720_TRA_Analysis.csv	2.607	0.11	0.1768	0.0055	0.69292	1049	15	1302	16	1726	13.5	39.2236	1049	15
96ADb25a-42	Output_1_2	6721_TRA_Analysis.csv	2.098	0.046	0.194	0.0026	0.44371	1143	7	1147.9	7.5	1183	15	3.38123	1143	7
96ADb25a-33	Output_1_33	6720_TRA_Analysis.csv	2.83	0.15	0.1945	0.0067	0.96784	1145	18	1362	19.5	1679	14	31.8046	1145	18
96ADb25a-89	Output_1_9	6722_TRA_Analysis.csv	3.323	0.25	0.2213	0.0071	0.75887	1288	18.5	1485	30.5	1758	17.5	26.7349	1288	18.5
96ADb25a-51	Output_1_11	6721_TRA_Analysis.csv	3.126	0.077	0.2531	0.003	0.69201	1455	7.5	1439	9.5	1432	11	-1.60615	1432	11
96ADb25a-36	Output_1_36	6720_TRA_Analysis.csv	3.26	0.36	0.226	0.022	0.98612	1310	55	1454	45	1685	19	22.2552	1685	19
96ADb25a-120	Output_1_40	6722_TRA_Analysis.csv	4.48	0.35	0.3046	0.0088	0.52852	1714	22	1727	32	1734	19	1.1534	1734	19
96ADb25a-26	Output_1_26	6720_TRA_Analysis.csv	4.627	0.18	0.3112	0.0095	0.80135	1747	23.5	1754	17	1736	7	-0.633641	1736	7
96ADb25a-41	Output_1_1	6721_TRA_Analysis.csv	3.32	0.16	0.2281	0.0093	0.94225	1323	24.5	1482	18.5	1745	13	24.1834	1745	13
96ADb25a-118	Output_1_38	6722_TRA_Analysis.csv	4.687	0.35	0.3166	0.0088	0.45689	1773	21.5	1764.8	31.5	1745	12.5	-1.60458	1745	12.5
96ADb25a-86	Output_1_6	6722_TRA_Analysis.csv	4.76	0.38	0.3184	0.0098	0.54665	1782	24	1776	34.5	1745	24.5	-2.12034	1745	24.5
96ADb25a-105	Output_1_25	6722_TRA_Analysis.csv	4.355	0.33	0.2927	0.009	0.60655	1655	22.5	1703	31	1750	11.5	5.42857	1750	11.5
96ADb25a-77	Output_1_37	6721_TRA_Analysis.csv	4.73	0.15	0.3167	0.0065	0.72768	1773	16	1771	13.5	1752	16	-1.19863	1752	16
96ADb25a-113	Output_1_33	6722_TRA_Analysis.csv	4.727	0.36	0.3171	0.0095	0.38848	1775	23.5	1776	35	1756	17.5	-1.082	1756	17.5
96ADb25a-112	Output_1_32	6722_TRA_Analysis.csv	4.631	0.35	0.3107	0.0084	0.66737	1744	20.5	1755	31	1760	9	0.909091	1760	9
96ADb25a-75	Output_1_35	6721_TRA_Analysis.csv	4.773	0.11	0.3198	0.0045	0.69554	1788	11	1780	10	1763	12	-1.41804	1763	12
96ADb25a-10	Output_1_10	6720_TRA_Analysis.csv	4.74	0.21	0.3164	0.01	0.52446	1772	24.5	1773	18.5	1772	18.5	0	1772	18.5
96ADb25a-52	Output_1_12	6721_TRA_Analysis.csv	4.669	0.12	0.3145	0.004	0.39399	1762	10	1761	10.5	1777	16	0.844119	1777	16
96ADb25a-106	Output_1_26	6722_TRA_Analysis.csv	4.724	0.36	0.3144	0.0094	0.22075	1762	23	1771	32	1778	20.5	0.899888	1778	20.5
96ADb25a-63	Output_1_23	6721_TRA_Analysis.csv	4.76	0.15	0.3174	0.0054	0.27801	1777	13	1777	13	1778	25.5	0.056243	1778	25.5
96ADb25a-81	Output_1_1	6722_TRA_Analysis.csv	4.85	0.37	0.3174	0.0098	0.58421	1777	24	1793	33	1782	17	0.280584	1782	17
96ADb25a-24	Output_1_24	6720_TRA_Analysis.csv	4.694	0.19	0.3127	0.0096	0.34674	1754	23.5	1769	18.5	1785	16.5	1.73669	1785	16.5
96ADb25a-108	Output_1_28	6722_TRA_Analysis.csv	4.97	0.38	0.3281	0.011	0.45768	1829	26.5	1812	32.5	1786	25	-2.40761	1786	25
96ADb25a-29	Output_1_29	6720_TRA_Analysis.csv	4.654	0.19	0.3062	0.0094	0.11733	1722	23.5	1762	18.5	1787	20	3.63738	1787	20
96ADb25a-13	Output_1_13	6720_TRA_Analysis.csv	4.87	0.22	0.3208	0.01	0.46215	1794	25	1796	19	1789	22.5	-0.279486	1789	22.5
96ADb25a-16	Output_1_16	6720_TRA_Analysis.csv	5.021	0.2	0.3303	0.01	0.48408	1840	24.5	1822	17	1790	13.5	-2.7933	1790	13.5
96ADb25a-2	Output_1_2	6720_TRA_Analysis.csv	4.845	0.19	0.315	0.0093	0.65362	1765	23	1792	17	1801	10	1.99889	1801	10
96ADb25a-22	Output_1_22	6720_TRA_Analysis.csv	5.053	0.2	0.3287	0.0096	0.66608	1832	23.5	1828.1	16.5	1811	8.5	-1.15958	1811	8.5
96ADb25a-96	Output_1_16	6722_TRA_Analysis.csv	5.01	0.39	0.3298	0.0091	0.74134	1837	22	1826	31	1813	16	-1.32377	1813	16
96ADb25a-20	Output_1_20	6720_TRA_Analysis.csv	5.3	0.25	0.3393	0.012	0.30055	1883	28.5	1868	20.5	1813	32.5	-3.861	1813	32.5
96ADb25a-69	Output_1_29	6721_TRA_Analysis.csv	4.9	0.14	0.3183	0.0055	0.48835	1781	13.5	1801	12.5	1815	18.5	1.87328	1815	18.5
96ADb25a-72	Output_1_32	6721_TRA_Analysis.csv	4.97	0.13	0.3156	0.0074	0.68667	1768	18	1814	11	1820	11	2.85714	1820	11
96ADb25a-85	Output_1_5	6722_TRA_Analysis.csv	4.66	0.36	0.3033	0.0095	0.22925	1707	23.5	1759	33	1821	24.5	6.2603	1821	24.5
96ADb25a-73	Output_1_33	6721_TRA_Analysis.csv	4.908	0.11	0.3212	0.0048	0.37243	1795	11.5	1807	11	1823	15	1.53593	1823	15
96ADb25a-110	Output_1_30	6722_TRA_Analysis.csv	5.161	0.39	0.337	0.01	0.50649	1872	24	1846	32	1829	16.5	-2.35101	1829	16.5
96ADb25a-45	Output_1_5	6721_TRA_Analysis.csv	4.567	0.12	0.2974	0.0054	0.73032	1678	13.5	1743	11	1831	14	8.35609	1831	14
96ADb25a-49	Output_1_9	6721_TRA_Analysis.csv	4.81	0.16	0.3121	0.0073	0.56365	1759	19	1786	14	1831	21.5	3.93228	1831	21.5
96ADb25a-93	Output_1_13	6722_TRA_Analysis.csv	5.16	0.4	0.3374	0.01	0.42189	1874	24	1844	33.5	1832	20.5	-2.29258	1832	20.5
96ADb25a-17	Output_1_17	6720_TRA_Analysis.csv	4.98	0.21	0.3192	0.011	0.55022	1785	27.5	1814	18.5	1838	19	2.88357	1838	19
96ADb25a-14	Output_1_14	6720_TRA_Analysis.csv	5.124	0.21	0.3272	0.01	0.24606	1825	24	1840	17.5	1847	16.5	1.19112	1847	16.5
96ADb25a-99	Output_1_19	6722_TRA_Analysis.csv	5.085	0.38	0.3245	0.0093	0.001	1811	22.5	1833	32	1849	21	2.05516	1849	21
96ADb25a-79	Output_1_39	6721_TRA_Analysis.csv	5.37	0.17	0.3382	0.0061	0.48057	1877	15	1879	13.5	1850	18	-1.45946	1850	18
96ADb25a-38	Output_1_38	6720_TRA_Analysis.csv	4.67	0.24	0.2999	0.01	0.65473	1690	25	1760	22	1851	23	8.698	1851	23
96ADb25a-97	Output_1_17	6722_TRA_Analysis.csv	5.111	0.38	0.3254	0.0089	0.40072	1816	21.5	1837	32	1853	14.5	1.99676	1853	14.5
96ADb25a-74	Output_1_34	6721_TRA_Analysis.csv	5.15	0.14	0.3283	0.0044	0.32934	1830	11	1847	12.5	1853	18.5	1.24123	1853	18.5
96ADb25a-117	Output_1_37	6722_TRA_Analysis.csv	5.239	0.4	0.3341	0.01	0.69214	1858	25	1858	32.5	1854	14.5	-0.21575	1854	14.5
96ADb25a-56	Output_1_16	6721_TRA_Analysis.csv	5.227	0.14	0.3362	0.0051	0.4949	1868	12.5	1856	11.5	1860	16	-0.430108	1860	16
96ADb25a-90	Output_1_10	6722_TRA_Analysis.csv	5.12	0.39	0.3263	0.0093	0.19849	1820	22.5	1844	34.5	1864	24.5	2.36052	1864	24.5
96ADb25a-59	Output_1_19	6721_TRA_Analysis.csv	5.249	0.14	0.3316	0.004	0.68539	1846	9.5	1860	11.5	1864	14	0.965665	1864	14
96ADb25a-12	Output_1_12	6720_TRA_Analysis.csv	5.12	0.22	0.3244	0.0097	0.47554	1811	23.5	1839	18	1867	17	2.99946	1867	17
96ADb25a-65	Output_1_25	6721_TRA_Analysis.csv	5.25	0.17	0.335	0.0079	0.060765	1862	19	1864	15	1868	31.5	0.321199	1868	31.5
96ADb25a-44	Output_1_4	6721_TRA_Analysis.csv	5.01	0.15	0.3251	0.0068	0.23782	1814	16.5	1820	13	1871	25.5	3.0465	1871	25.5
96ADb25a-82	Output_1_2	6722_TRA_Analysis.csv	5.222	0.39	0.3295	0.01	0.58133	1835	25.5	1856	32.5	1872	17.5	1.9765	1872	17.5
96ADb25a-57	Output_1_17	6721_TRA_Analysis.csv	4.973	0.13	0.3166	0.0042	0.48548	1773	10.5	1814	11	1873	15.5	5.33903	1873	15.5
96ADb25a-11	Output_1_11	6720_TRA_Analysis.csv	5.25	0.24	0.3262	0.01	0.41706	1820	24.5	1860	19.5	1873	23	2.82968	1873	23
96ADb25a-84	Output_1_4	6722_TRA_Analysis.csv	4.94	0.44	0.311	0.014	0.83655	1743	35.5	1803	38	1874	20	6.99039	1874	20
96ADb25a-30	Output_1_30	6720_TRA_Analysis.csv	5.23	0.22	0.3265	0.01	0.44847	1821	25	1857	18	1889	16	3.59979	1889	16
96ADb25a-94	Output_1_14	6722_TRA_Analysis.csv	5.44	0.42	0.3379	0.013	0.62036	1876	30.5	1896	36	1895	23	1.00264	1895	23
96ADb25a-21	Output_1_21	6720_TRA_Analysis.csv	5.46	0.23	0.3372	0.01	0.087048	1873	24.5	1893	18.5	1902	20	1.52471	1902	20
96ADb25a-92	Output_1_12	6722_TRA_Analysis.csv	5.239	0.39	0.3223	0.0096	0.87151	1801	23.5	1858	32	1920	9.5	6.19792	1920	9.5
96ADb25a-18	Output_1_18	6720_TRA_Analysis.csv	5.703	0.23	0.3486	0.011	0.75048	1927	26.5	1935	19	1927	8	0	1927	8
96ADb25a-98	Output_1_18	6722_TRA_Analysis.csv	5.63	0.43	0.3443	0.0094	0.38058	1907	22.5	1920	33.5	1935	21	1.44703	1935	21
96ADb25a-62	Output_1_22	6721_TRA_Analysis.csv	5.27	0.16	0.3229	0.0062	0.80456	1804	15	1863	13	1939	11.5	6.96235	1939	11.5
96ADb25a-55	Output_1_15	6721_TRA_Analysis.csv	5.2	0.19	0.3243	0.0085	0.25559	1810	20.5	1850	15.5	1939	33	6.65291	1939	33
96ADb25a-3	Output_1_3	6720_TRA_Analysis.csv	5.69	0.24	0.3417	0.011	0.45224	1894	26	1929	19	1942	20.5	2.47168	1942	20.5
96ADb25a-116	Output_1_36	6722_TRA_Analysis.csv	6	0.47	0.3669	0.011	0.66732	2015	25	1974	34.5	1943	15	-3.70561	1943	15
96ADb25a-37	Output_1_37	6720_TRA_Analysis.csv	5.61	0.24	0.3428	0.011	0.077154	1900	25.5	1918	19	1966	24.5	3.35707	1966	24.5
96ADb25a-7	Output_1_7	6720_TRA_Analysis.csv	5.79	0.3	0.348	0.015	0.1539	1923	35.5	1942	23	1972	42.5	2.48479	1972	42.5
96ADb25a-43	Output_1_3	6721_TRA_Analysis.csv	6.03	0.18	0.3511	0.0044	0.34624	1940	10.5	1984	13.5	2039	19.5	4.85532	2039	19.5
96ADb25a-76	Output_1_36	6721_TRA_Analysis.csv	6.67	0.21	0.3773	0.0072	0.6282	2063	17	2072	13	2057	17	-0.291687	2057	17
96ADb25a-102	Output_1_22	6722_TRA_Analysis.csv	6.6	0.51	0.3738	0.011	0.38495	2047	25.5	2058	34.5	2062	21.5	0.727449	2062	21.5
96ADb25a-80	Output_1_40	6721_TRA_Analysis.csv	6.79	0.17	0.3723	0.0048	0.001	2040	11.5	2084	11	2087	17	2.25204	2087	17
96ADb25a-107	Output_1_27	6722_TRA_Analysis.csv	6.98	0.53	0.3805	0.012	0.56511	2078	27.5	2108	33.5	2105	15	1.28266	2105	15
96ADb25a-103	Output_1_23	6722_TRA_Analysis.csv	6.97	0.55	0.3814	0.011	0.40794	2083	25.5	2106	35	2127	19	2.06864	2127	19
96ADb25a-87	Output_1_7	6722_TRA_Analysis.csv	5.43	0.47	0.281	0.014	0.96724	1595	35.5	1885	38	2221	9.5	28.1855	2221	9.5
96ADb25a-35	Output_1_35	6720_TRA_Analysis.csv	8.66	0.42	0.4222	0.014	0.73788	2270	32	2300	22.5	2321	16.5	2.19733	2321	16.5
96ADb25a-50	Output_1_10	6721_TRA_Analysis.csv	6.29	0.49	0.293	0.02	0.91139	1655	50	2005	34	2427	19.5	31.8088	2427	19.5
96ADb25a-115	Output_1_35	6722_TRA_Analysis.csv	10.15	0.77	0.4668	0.014	0.61041	2469	31	2452	32.5	2434	12.5	-1.43796	2434	12.5
96ADb25a-95	Output_1_15	6722_TRA_Analysis.csv	10.28	0.77	0.4655	0.014	0.53816	2463	30.5	2459	35.5	2464	15.5	0.0405844	2464	15.5
96ADb25a-19	Output_1_19	6720_TRA_Analysis.csv	9.8	0.42	0.4263	0.013	0.7142	2289	29.5	2415	20	2509	11.5	8.76843	2509	11.5
96ADb25a-101	Output_1_21	6722_TRA_Analysis.csv	9.77	0.77	0.416	0.016	0.967	2243	35.5	2411	36	2557	7	12.28	2557	7
96ADb25a-119	Output_1_39	6722_TRA_Analysis.csv	11.73	0.88	0.4972	0.013	0.7164	2601	29	2582.6	35	2566	8.5	-1.36399	2566	8.5
96ADb25a-58	Output_1_18	6721_TRA_Analysis.csv	10.91	0.25	0.4634	0.0065	0.58929	2454	14.5	2515	10.5	2571	9.5	4.55076	2571	9.5
96ADb25a-4	Output_1_4	6720_TRA_Analysis.csv	11.3	0.68	0.467	0.026	0.96974	2487	55	2556	26.5	2580	10.5	3.60465	2580	10.5
96ADb25a-46	Output_1_6	6721_TRA_Analysis.csv	11.09	0.27	0.4713	0.0074	0.7663	2489	16	2530	11.5	2581	8	3.56451	2581	8
96ADb25a-109	Output_1_29	6722_TRA_Analysis.csv	11.55	0.86	0.4889	0.014	0.83603	2565	30	2568	35.5	2583	8	0.696864	2583	8
96ADb25a-91	Output_1_11	6722_TRA_Analysis.csv	11.69	0.86	0.4851	0.014	0.7662	2549	31.5	2580	35	2586	10.5	1.43078	2586	10.5
96ADb25a-64	Output_1_24	6721_TRA_Analysis.csv	11.65	0.36	0.4932	0.0075	0.45057	2584	16	2575	14.5	2586	20.5	0.0773395	2586	20.5
96ADb25a-71	Output_1_31	6721_TRA_Analysis.csv	12.01	0.37	0.4927	0.0094	0.45343	2582	20.5	2604	14.5	2592	18.5	0.385802	2592	18.5
96ADb25a-8	Output_1_8	6720_TRA_Analysis.csv	11.47	0.48	0.4782	0.015	0.33695	2519	32.5	2561	20	2594	14.5	2.89129	2594	14.5
96ADb25a-66	Output_1_26	6721_TRA_Analysis.csv	11.21	0.26	0.4668	0.0058	0.6422	2469	13	2541	10.5	2598	9.5	4.96536	2598	9.5
96ADb25a-5	Output_1_5	6720_TRA_Analysis.csv	12.1	0.5	0.4927	0.016	0.59138	2582	33.5	2611	20	2607	11	0.958957	2607	11
96ADb25a-32	Output_1_32	6720_TRA_Analysis.csv	11.92	0.49	0.4873	0.015	0.57925	2559	33	2601	18	2612	11.5	2.0291	2612	11.5
96ADb25a-9	Output_1_9	6720_TRA_Analysis.csv	12.04	0.52	0.4917	0.016	0.7309	2577	34.5	2606	20.5	2617	10	1.52847	2617	10
96ADb25a-88	Output_1_8	6722_TRA_Analysis.csv	12.18	0.93	0.4953	0.015	0.75475	2593	32	2617	36.5	2628	13.5	1.33181	2628	13.5
96ADb25a-27	Output_1_27	6720_TRA_Analysis.csv	12.1	0.55	0.485	0.017	0.88137	2549	36.5	2611	21.5	2643	9.5	3.55656	2643	9.5
96ADb25a-111	Output_1_31	6722_TRA_Analysis.csv	13.1	1	0.52	0.017	0.68437	2698	36.5	2692	35.5	2673	20	-0.935279	2673	20
96ADb25a-78	Output_1_38	6721_TRA_Analysis.csv	12.99	0.35	0.5137	0.0089	0.49347	2672	19	2678	12.5	2675	17.5	0.11215	2675	17.5
96ADb25a-100	Output_1_20	6722_TRA_Analysis.csv	13.21	0.99	0.5227	0.015	0.83373	2710	32.5	2694	35.5	2681	10	-1.08169	2681	10
96ADb25a-31	Output_1_31	6720_TRA_Analysis.csv	13.24	0.53	0.52	0.017	0.35684	2698	36.5	2696	19	2685	17	-0.484171	2685	17
96ADb25a-54	Output_1_14	6721_TRA_Analysis.csv	13.01	0.31	0.5108	0.0088	0.54683	2660	18.5	2683	12	2702	13.5	1.5544	2702	13.5
96ADb25a-1	Output_1_1	6720_TRA_Analysis.csv	13.05	0.51	0.4992	0.014	0.56157	2610	31	2683	19	2707	9	3.5833	2707	9
96ADb25a-61	Output_1_21	6721_TRA_Analysis.csv	13.47	0.4	0.521	0.012	0.54858	2702	25.5	2712	14.5	2719	19.5	0.62523	2719	19.5
96ADb25a-68	Output_1_28	6721_TRA_Analysis.csv	13.97	0.38	0.5311	0.0091	0.08515	2746	19	2747	13	2751	18.5	0.181752	2751	18.5
96ADb25a-25	Output_1_25	6720_TRA_Analysis.csv	13.61	0.59	0.5131	0.016	0.55427	2669	33.5	2722	20.5	2753	14.5	3.05122	2753	14.5
96ADb25a-15	Output_1_15	6720_TRA_Analysis.csv	10.34	0.8	0.381	0.024	0.96934	2080	55	2454	37.5	2780	15	25.1799	2780	15
96ADb25a-34	Output_1_34	6720_TRA_Analysis.csv	14.44	0.69	0.522	0.024	0.44741	2723	47	2777	22.5	2817	23.5	3.33688	2817	23.5
96ADb25a-104	Output_1_24	6722_TRA_Analysis.csv	15.16	1.2	0.546	0.02	0.56651	2808	41	2824	37	2831	20	0.812434	2831	20
96ADb25a-67	Output_1_27	6721_TRA_Analysis.csv	16.56	0.42	0.564	0.011	0.79625	2881	22.5	2909	12	2920	9.5	1.33562	2920	9.5
96ADb25a-47	Output_1_7	6721_TRA_Analysis.csv	8.78	0.49	0.269	0.012	0.97995	1535	30	2309	27	3107	15.5	50.5954	3107	15.5
96ADb25a-70	Output_1_30	6721_TRA_Analysis.csv	22.06	0.56	0.6056	0.01	0.83805	3052	20.5	3185	12.5	3261	7.5	6.40908	3261	7.5
SAMPLE 97ADb43a
97ADb43a-76	Output_1_36	6715_TRA_Analysis.csv	3.5	0.23	0.2677	0.0063	0.31662	1529	16	1524	26	1499	31	-2.00133	1499	31
97ADb43a-68	Output_1_28	6715_TRA_Analysis.csv	3.056	0.19	0.2169	0.0055	0.87553	1265	14.5	1421	23.5	1648	9.5	23.2403	1648	9.5
97ADb43a-30	Output_1_30	6714_TRA_Analysis.csv	3.9	0.17	0.2664	0.0086	0.95171	1522	22	1618	16	1695	9.5	10.2065	1695	9.5
97ADb43a-73	Output_1_33	6715_TRA_Analysis.csv	4.713	0.27	0.3222	0.0043	0.27414	1800	10.5	1769	24	1702	17	-5.75793	1702	17
97ADb43a-104	Output_1_24	6716_TRA_Analysis.csv	3.58	0.11	0.2473	0.0086	0.91131	1424	22.5	1543	12	1717	11	17.0646	1717	11
97ADb43a-96	Output_1_16	6716_TRA_Analysis.csv	2.683	0.071	0.1838	0.0064	0.86529	1088	17.5	1327	10.5	1718	13	36.6705	1718	13
97ADb43a-62	Output_1_22	6715_TRA_Analysis.csv	4.63	0.28	0.3194	0.0069	0.33856	1786	17	1758	22.5	1731	24.5	-3.17735	1731	24.5
97ADb43a-25	Output_1_25	6714_TRA_Analysis.csv	3.25	0.16	0.2213	0.0086	0.92209	1288	22.5	1468	18.5	1739	14.5	25.9344	1739	14.5
97ADb43a-82	Output_1_2	6716_TRA_Analysis.csv	3.548	0.06	0.2449	0.0073	0.75858	1412	19	1537	7	1739	11	18.8039	1739	11
97ADb43a-66	Output_1_26	6715_TRA_Analysis.csv	4.736	0.27	0.3203	0.0032	0.35052	1791	8	1773.4	23.5	1743	12	-2.75387	1743	12
97ADb43a-29	Output_1_29	6714_TRA_Analysis.csv	3.76	0.23	0.252	0.013	0.98235	1445	35	1580	25	1746	10.5	17.2394	1746	10.5
97ADb43a-54	Output_1_14	6715_TRA_Analysis.csv	4.359	0.26	0.2969	0.0035	0.70296	1676	9	1704	24	1748	12.5	4.11899	1748	12.5
97ADb43a-69	Output_1_29	6715_TRA_Analysis.csv	4.594	0.26	0.309	0.0033	0.6976	1736	8	1747.9	23.5	1759	9	1.30756	1759	9
97ADb43a-109	Output_1_29	6716_TRA_Analysis.csv	4.03	0.14	0.2765	0.011	0.93992	1573	27.5	1645	14.5	1762	10	10.7264	1762	10
97ADb43a-81	Output_1_1	6716_TRA_Analysis.csv	3.38	0.093	0.2267	0.0064	0.63721	1317	17	1498	11	1763	15.5	25.2978	1763	15.5
97ADb43a-67	Output_1_27	6715_TRA_Analysis.csv	4.71	0.29	0.3189	0.0041	0.17553	1784	10	1773	24	1765	20	-1.07649	1765	20
97ADb43a-70	Output_1_30	6715_TRA_Analysis.csv	2.95	0.28	0.197	0.016	0.97719	1156	43	1386	36	1768	17	34.6154	1768	17
97ADb43a-108	Output_1_28	6716_TRA_Analysis.csv	4.051	0.064	0.2722	0.0075	0.66722	1552	19	1644	6.5	1771	11	12.3659	1771	11
97ADb43a-88	Output_1_8	6716_TRA_Analysis.csv	4.78	0.13	0.3215	0.0099	0.63723	1797	24	1785	10.5	1772	20	-1.41084	1772	20
97ADb43a-63	Output_1_23	6715_TRA_Analysis.csv	4.706	0.27	0.3135	0.0042	0.43953	1758	10.5	1768	24	1774	12	0.901917	1774	12
97ADb43a-83	Output_1_3	6716_TRA_Analysis.csv	4.636	0.084	0.313	0.0085	0.35224	1755	21	1758	7	1775	18	1.12676	1775	18
97ADb43a-28	Output_1_28	6714_TRA_Analysis.csv	4.135	0.13	0.2726	0.0042	0.61919	1554	10.5	1661	13	1777	11.5	12.5492	1777	11.5
97ADb43a-58	Output_1_18	6715_TRA_Analysis.csv	4.783	0.28	0.3211	0.0025	0.47689	1795	6	1782	24	1777	11.5	-1.01294	1777	11.5
97ADb43a-61	Output_1_21	6715_TRA_Analysis.csv	4.11	0.25	0.2731	0.0074	0.89041	1556	18.5	1655	25	1777	10	12.4367	1777	10
97ADb43a-97	Output_1_17	6716_TRA_Analysis.csv	4.354	0.064	0.2885	0.0071	0.54158	1634	18	1703	6	1777	10.5	8.04727	1777	10.5
97ADb43a-3	Output_1_3	6714_TRA_Analysis.csv	4.23	0.15	0.2819	0.0069	0.85823	1600	17.5	1679	15	1779	9	10.0618	1779	9
97ADb43a-51	Output_1_11	6715_TRA_Analysis.csv	4.791	0.28	0.3199	0.0045	0.74817	1789	11	1783	25	1782	13.5	-0.392817	1782	13.5
97ADb43a-93	Output_1_13	6716_TRA_Analysis.csv	4.761	0.067	0.3125	0.0081	0.53013	1753	20	1781	6.5	1787	14.5	1.90263	1787	14.5
97ADb43a-100	Output_1_20	6716_TRA_Analysis.csv	4.685	0.058	0.3071	0.0083	0.70425	1726	20.5	1767	6	1791	12	3.62926	1791	12
97ADb43a-9	Output_1_9	6714_TRA_Analysis.csv	5.092	0.16	0.3369	0.0054	0.73983	1872	13	1834	13	1796	9	-4.23163	1796	9
97ADb43a-115	Output_1_35	6716_TRA_Analysis.csv	4.382	0.059	0.2926	0.0075	0.6119	1654	18.5	1709	5.5	1797	12.5	7.95771	1797	12.5
97ADb43a-12	Output_1_12	6714_TRA_Analysis.csv	4.752	0.15	0.315	0.0054	0.37487	1765	13	1779	13	1798	16.5	1.83537	1798	16.5
97ADb43a-18	Output_1_18	6714_TRA_Analysis.csv	4.841	0.15	0.3161	0.0046	0.55786	1771	11.5	1792	13	1798	11	1.50167	1798	11
97ADb43a-27	Output_1_27	6714_TRA_Analysis.csv	4.608	0.16	0.3019	0.0074	0.84288	1700	18.5	1750	14.5	1802	12.5	5.66038	1802	12.5
97ADb43a-72	Output_1_32	6715_TRA_Analysis.csv	5.126	0.3	0.3323	0.0053	0.39581	1849	13	1840	25	1805	18	-2.43767	1805	18
97ADb43a-45	Output_1_5	6715_TRA_Analysis.csv	4.326	0.26	0.288	0.0042	0.61064	1631	10.5	1698	24.5	1807	16	9.7399	1807	16
97ADb43a-20	Output_1_20	6714_TRA_Analysis.csv	4.774	0.14	0.309	0.0064	0.46857	1735	16	1780.2	12.5	1808	15.5	4.03761	1808	15.5
97ADb43a-117	Output_1_37	6716_TRA_Analysis.csv	4.848	0.067	0.3223	0.0086	0.55904	1801	21	1793	6	1809	14.5	0.442233	1809	14.5
97ADb43a-92	Output_1_12	6716_TRA_Analysis.csv	4.88	0.1	0.3154	0.0084	0.32315	1767	20.5	1798	8.5	1812	21	2.48344	1812	21
97ADb43a-11	Output_1_11	6714_TRA_Analysis.csv	5.045	0.16	0.3327	0.0059	0.72001	1851	14	1827	13	1816	7	-1.92731	1816	7
97ADb43a-47	Output_1_7	6715_TRA_Analysis.csv	4.86	0.29	0.3188	0.0029	0.51123	1784	7	1795	24.5	1821	14	2.03185	1821	14
97ADb43a-14	Output_1_14	6714_TRA_Analysis.csv	4.19	0.16	0.2764	0.009	0.94667	1572	23	1670	15.5	1823	8.5	13.7685	1823	8.5
97ADb43a-21	Output_1_21	6714_TRA_Analysis.csv	4.32	0.2	0.2803	0.01	0.86705	1592	26	1695	19	1825	11	12.7671	1825	11
97ADb43a-53	Output_1_13	6715_TRA_Analysis.csv	4.89	0.31	0.321	0.0085	0.7527	1794	20.5	1799	26.5	1827	16	1.80624	1827	16
97ADb43a-71	Output_1_31	6715_TRA_Analysis.csv	5.06	0.31	0.3253	0.0049	0.30466	1815	12	1832	24	1831	21.5	0.873839	1831	21.5
97ADb43a-35	Output_1_35	6714_TRA_Analysis.csv	5.28	0.19	0.3316	0.0076	0.54861	1846	18.5	1864	15	1833	21	-0.70922	1833	21
97ADb43a-86	Output_1_6	6716_TRA_Analysis.csv	5.045	0.078	0.3276	0.0083	0.64201	1827	20.5	1826	6.5	1835	12	0.435967	1835	12
97ADb43a-120	Output_1_40	6716_TRA_Analysis.csv	4.879	0.081	0.317	0.0084	0.57604	1775	20.5	1798	7	1840	14	3.53261	1840	14
97ADb43a-56	Output_1_16	6715_TRA_Analysis.csv	5.177	0.3	0.3334	0.0042	0.25058	1854	10	1848	25	1848	16.5	-0.324675	1848	16.5
97ADb43a-49	Output_1_9	6715_TRA_Analysis.csv	4.981	0.29	0.3218	0.005	0.52938	1798	12	1816	24.5	1850	16	2.81081	1850	16
97ADb43a-24	Output_1_24	6714_TRA_Analysis.csv	4.56	0.16	0.2953	0.0049	0.46827	1668	12	1740	15	1852	19	9.93521	1852	19
97ADb43a-119	Output_1_39	6716_TRA_Analysis.csv	4.942	0.083	0.3163	0.0082	0.34567	1772	20	1809	7.5	1852	19.5	4.31965	1852	19.5
97ADb43a-116	Output_1_36	6716_TRA_Analysis.csv	4.669	0.058	0.3007	0.0072	0.086708	1695	18	1761	5.5	1856	16	8.67457	1856	16
97ADb43a-84	Output_1_4	6716_TRA_Analysis.csv	5.125	0.072	0.3306	0.0087	0.25831	1841	21	1840	6	1864	17.5	1.23391	1864	17.5
97ADb43a-17	Output_1_17	6714_TRA_Analysis.csv	3.48	0.22	0.22	0.013	0.93983	1278	36	1518	24.5	1866	20	31.5113	1866	20
97ADb43a-16	Output_1_16	6714_TRA_Analysis.csv	4.82	0.21	0.301	0.011	0.96701	1693	28.5	1786	20	1891	13	10.4707	1891	13
97ADb43a-87	Output_1_7	6716_TRA_Analysis.csv	5.18	0.18	0.3221	0.0096	0.57332	1800	23.5	1847	16.5	1892	32	4.86258	1892	32
97ADb43a-101	Output_1_21	6716_TRA_Analysis.csv	5.327	0.091	0.3317	0.0088	0.24788	1847	21.5	1873	7.5	1898	20	2.68704	1898	20
97ADb43a-95	Output_1_15	6716_TRA_Analysis.csv	5.43	0.14	0.333	0.0096	0.85012	1853	23	1887	12	1913	14.5	3.13643	1913	14.5
97ADb43a-118	Output_1_38	6716_TRA_Analysis.csv	5.424	0.08	0.3357	0.0088	0.80841	1866	21.5	1888	6.5	1937	7	3.66546	1937	7
97ADb43a-4	Output_1_4	6714_TRA_Analysis.csv	5.99	0.18	0.336	0.0065	0.3459	1867	15.5	1974	13	2065	14	9.58838	2065	14
97ADb43a-43	Output_1_3	6715_TRA_Analysis.csv	6.73	0.4	0.38	0.0049	0.42055	2076	11.5	2076	26	2098	16	1.04862	2098	16
97ADb43a-34	Output_1_34	6714_TRA_Analysis.csv	5.4	0.27	0.2886	0.005	0.28825	1634	12.5	1882	21	2138	34.5	23.5734	2138	34.5
97ADb43a-31	Output_1_31	6714_TRA_Analysis.csv	4.75	0.2	0.2545	0.0055	0.5236	1461	14	1775	17	2155	27.5	32.2042	2155	27.5
97ADb43a-46	Output_1_6	6715_TRA_Analysis.csv	3.16	0.21	0.17	0.0041	0.81883	1012	11.5	1446	25	2176	17	53.4926	2176	17
97ADb43a-102	Output_1_22	6716_TRA_Analysis.csv	3.58	0.21	0.1858	0.0094	0.94875	1098	25.5	1539	23	2211	18	50.3392	2211	18
97ADb43a-32	Output_1_32	6714_TRA_Analysis.csv	8.899	0.26	0.4334	0.0077	0.56367	2321	17.5	2327.5	13.5	2291	10.5	-1.30947	2291	10.5
97ADb43a-59	Output_1_19	6715_TRA_Analysis.csv	6.84	0.67	0.324	0.026	0.98429	1800	65	2077	43	2382	10.5	24.4332	2382	10.5
97ADb43a-111	Output_1_31	6716_TRA_Analysis.csv	6.18	0.18	0.2932	0.0096	0.82321	1657	24	2000	12.5	2415	13	31.3872	2415	13
97ADb43a-85	Output_1_5	6716_TRA_Analysis.csv	6.79	0.4	0.317	0.017	0.97873	1771	41.5	2076	26	2432	13	27.1793	2432	13
97ADb43a-39	Output_1_39	6714_TRA_Analysis.csv	4.73	0.37	0.215	0.012	0.98932	1255	32	1762	33	2438	17.5	48.5234	2438	17.5
97ADb43a-79	Output_1_39	6715_TRA_Analysis.csv	7.5	0.46	0.3345	0.0077	0.76486	1860	18.5	2171	27.5	2453	14.5	24.1745	2453	14.5
97ADb43a-74	Output_1_34	6715_TRA_Analysis.csv	10.53	0.62	0.4697	0.008	0.74058	2481	17.5	2482	27	2469	11.5	-0.486027	2469	11.5
97ADb43a-106	Output_1_26	6716_TRA_Analysis.csv	7.99	0.27	0.364	0.014	0.94074	2001	32	2228	15	2472	8.5	19.0534	2472	8.5
97ADb43a-10	Output_1_10	6714_TRA_Analysis.csv	10.85	0.34	0.4837	0.0094	0.54556	2550	19	2509	14.5	2480	14	-2.82258	2480	14
97ADb43a-65	Output_1_25	6715_TRA_Analysis.csv	9.98	0.77	0.444	0.01	0.66572	2366	23	2437	37	2523	35	6.22275	2523	35
97ADb43a-7	Output_1_7	6714_TRA_Analysis.csv	11.66	0.37	0.4944	0.0087	0.82025	2589	19	2577	15	2553	8.5	-1.41011	2553	8.5
97ADb43a-107	Output_1_27	6716_TRA_Analysis.csv	11.02	0.18	0.475	0.012	0.61078	2505	27	2528	7	2554	10.5	1.91856	2554	10.5
97ADb43a-103	Output_1_23	6716_TRA_Analysis.csv	9.86	0.38	0.419	0.017	0.95009	2253	38	2418	18.5	2563	8	12.0952	2563	8
97ADb43a-15	Output_1_15	6714_TRA_Analysis.csv	7.83	0.31	0.3303	0.0071	0.074176	1839	17.5	2211	18	2566	27	28.332	2566	27
97ADb43a-48	Output_1_8	6715_TRA_Analysis.csv	11.75	0.67	0.4992	0.0094	0.53758	2610	20.5	2584	26.5	2571	13.5	-1.51692	2571	13.5
97ADb43a-13	Output_1_13	6714_TRA_Analysis.csv	11.73	0.37	0.5011	0.01	0.77874	2618	22	2592	18.5	2578	10.5	-1.55159	2578	10.5
97ADb43a-99	Output_1_19	6716_TRA_Analysis.csv	12	0.21	0.4955	0.015	0.7362	2594	32	2604	8.5	2597	12.5	0.115518	2597	12.5
97ADb43a-44	Output_1_4	6715_TRA_Analysis.csv	7.28	0.45	0.3056	0.0074	0.87086	1727	19.5	2145	27.5	2598	12.5	33.5258	2598	12.5
97ADb43a-98	Output_1_18	6716_TRA_Analysis.csv	12	0.1	0.4945	0.012	0.52553	2590	26	2604.1	4.05	2609	8	0.728248	2609	8
97ADb43a-105	Output_1_25	6716_TRA_Analysis.csv	11.45	0.15	0.4786	0.013	0.71744	2521	27.5	2563	7	2609	8	3.37294	2609	8
97ADb43a-2	Output_1_2	6714_TRA_Analysis.csv	12.12	0.36	0.4985	0.0077	0.68007	2607	16.5	2614	14	2610	8	0.114943	2610	8
97ADb43a-52	Output_1_12	6715_TRA_Analysis.csv	11.86	0.71	0.4957	0.0098	0.81964	2594	21	2593	27.5	2611	10.5	0.651092	2611	10.5
97ADb43a-55	Output_1_15	6715_TRA_Analysis.csv	12.33	0.72	0.5137	0.0054	0.50819	2672	11.5	2629	27.5	2611	14	-2.33627	2611	14
97ADb43a-78	Output_1_38	6715_TRA_Analysis.csv	11.66	0.67	0.4773	0.0051	0.6566	2515	11	2577	26.5	2612	9	3.71363	2612	9
97ADb43a-1	Output_1_1	6714_TRA_Analysis.csv	11.78	0.36	0.4865	0.0079	0.4779	2555	17	2586	14.5	2619	11	2.44368	2619	11
97ADb43a-36	Output_1_36	6714_TRA_Analysis.csv	10.29	0.49	0.42	0.016	0.95183	2259	35.5	2458	23	2621	10	13.8115	2621	10
97ADb43a-6	Output_1_6	6714_TRA_Analysis.csv	8.24	0.28	0.3356	0.0062	0.76779	1865	15	2257	15	2625	9.5	28.9524	2625	9.5
97ADb43a-114	Output_1_34	6716_TRA_Analysis.csv	11.9	0.14	0.4887	0.013	0.61558	2565	28.5	2596	5.5	2627	9.5	2.36011	2627	9.5
97ADb43a-33	Output_1_33	6714_TRA_Analysis.csv	5.73	0.19	0.2254	0.0055	0.78048	1310	14.5	1935	14	2634	13.5	50.2658	2634	13.5
97ADb43a-60	Output_1_20	6715_TRA_Analysis.csv	12.74	0.73	0.5215	0.007	0.32216	2705	15	2660	27	2634	10	-2.69552	2634	10
97ADb43a-40	Output_1_40	6714_TRA_Analysis.csv	8.46	0.55	0.34	0.032	0.84015	1880	75	2286	30.5	2645	36	28.9225	2645	36
97ADb43a-75	Output_1_35	6715_TRA_Analysis.csv	12.96	0.76	0.5107	0.0078	0.75706	2659	16.5	2676	27.5	2665	8.5	0.225141	2665	8.5
97ADb43a-8	Output_1_8	6714_TRA_Analysis.csv	11.34	0.37	0.4505	0.0079	0.83467	2397	17.5	2551	15.5	2671	6	10.2583	2671	6
97ADb43a-41	Output_1_1	6715_TRA_Analysis.csv	12.41	0.74	0.5025	0.0082	0.59369	2624	18	2635	28	2672	13.5	1.79641	2672	13.5
97ADb43a-22	Output_1_22	6714_TRA_Analysis.csv	12.84	0.44	0.5041	0.009	0.57078	2631	19.5	2667	16	2675	15.5	1.64486	2675	15.5
97ADb43a-77	Output_1_37	6715_TRA_Analysis.csv	12.78	0.77	0.5046	0.0082	0.77583	2633	17.5	2668	30.5	2675	12.5	1.57009	2675	12.5
97ADb43a-110	Output_1_30	6716_TRA_Analysis.csv	12.83	0.25	0.5145	0.014	0.81313	2675	29.5	2666	9.5	2676	9	0.0373692	2676	9
97ADb43a-5	Output_1_5	6714_TRA_Analysis.csv	12.98	0.41	0.5159	0.0085	0.81385	2681	18	2678	15	2678	6.5	-0.112024	2678	6.5
97ADb43a-64	Output_1_24	6715_TRA_Analysis.csv	12.8	0.74	0.5123	0.0073	0.54274	2666	15.5	2665	27	2678	13.5	0.448096	2678	13.5
97ADb43a-113	Output_1_33	6716_TRA_Analysis.csv	12.78	0.22	0.5109	0.014	0.32576	2660	29.5	2663	8	2684	14	0.894188	2684	14
97ADb43a-50	Output_1_10	6715_TRA_Analysis.csv	13.17	0.76	0.5221	0.0074	0.66943	2708	15.5	2691	27	2691	11	-0.631735	2691	11
97ADb43a-23	Output_1_23	6714_TRA_Analysis.csv	12.37	0.62	0.485	0.016	0.94225	2548	34	2629	23.5	2694	12.5	5.41945	2694	12.5
97ADb43a-19	Output_1_19	6714_TRA_Analysis.csv	13.29	0.44	0.5168	0.0094	0.87358	2685	20	2699	15.5	2700	8	0.555556	2700	8
97ADb43a-57	Output_1_17	6715_TRA_Analysis.csv	13.24	0.86	0.509	0.017	0.59368	2652	36	2695	30.5	2702	21.5	1.85048	2702	21.5
97ADb43a-89	Output_1_9	6716_TRA_Analysis.csv	13.62	0.28	0.5158	0.014	0.63459	2681	29.5	2722	10	2720	14	1.43382	2720	14
97ADb43a-94	Output_1_14	6716_TRA_Analysis.csv	13.55	0.19	0.5163	0.014	0.52387	2683	29.5	2722	7.5	2723	13	1.46897	2723	13
97ADb43a-90	Output_1_10	6716_TRA_Analysis.csv	13.57	0.21	0.5149	0.014	0.51787	2677	29.5	2719	7.5	2727	12.5	1.83352	2727	12.5
97ADb43a-112	Output_1_32	6716_TRA_Analysis.csv	13.64	0.27	0.5233	0.014	0.61704	2713	30	2724	9.5	2744	13	1.12974	2744	13
97ADb43a-91	Output_1_11	6716_TRA_Analysis.csv	9.2	0.33	0.345	0.013	0.86126	1911	30.5	2355	17	2745	13.5	30.3825	2745	13.5
97ADb43a-26	Output_1_26	6714_TRA_Analysis.csv	5.98	0.32	0.2227	0.0094	0.001	1295	25	1969	23.5	2760	65	53.0797	2760	65
97ADb43a-37	Output_1_37	6714_TRA_Analysis.csv	6.88	0.32	0.261	0.011	0.8233	1494	29.5	2102	19	2768	25	46.026	2768	25
97ADb43a-42	Output_1_2	6715_TRA_Analysis.csv	19.5	1.2	0.655	0.013	0.78427	3246	26	3066	29	2967	10.5	-9.40344	2967	10.5
97ADb43a-38	Output_1_38	6714_TRA_Analysis.csv	7.42	0.44	0.209	0.011	0.001	1221	28.5	2158	27.5	3190	70	61.7241	3190	70
SAMPLE 98ADb79a
98ADb79a-76	Output_1_36	6711_TRA_Analysis.csv	1.109	0.076	0.1271	0.0047	0.13862	771	13.5	763	18.5	735	47.5	-4.89796	771	13.5
98ADb79a-86	Output_1_6	6712_TRA_Analysis.csv	1.154	0.11	0.1307	0.004	0.001	792	11.5	774	26	810	100	2.22222	792	11.5
98ADb79a-14	Output_1_14	6710_TRA_Analysis.csv	1.335	0.061	0.1013	0.0026	0.88536	625	8	860	13	1557	15	59.8587	1557	15
98ADb79a-30	Output_1_30	6710_TRA_Analysis.csv	4.58	0.17	0.3158	0.0062	0.16264	1769	15	1745	16	1705	23.5	-3.75367	1705	23.5
98ADb79a-149	Output_1_29	6717_TRA_Analysis.csv	4.774	0.14	0.3229	0.0063	0.40788	1809	13.5	1780	12.5	1739	17.5	-4.0253	1739	17.5
98ADb79a-57	Output_1_17	6711_TRA_Analysis.csv	4.672	0.21	0.3162	0.0094	0.31128	1771	23	1762	19	1744	14	-1.54817	1744	14
98ADb79a-64	Output_1_24	6711_TRA_Analysis.csv	3.179	0.17	0.2161	0.0083	0.92223	1261	22	1451	21.5	1747	14	27.8191	1747	14
98ADb79a-3	Output_1_3	6710_TRA_Analysis.csv	4.617	0.17	0.3065	0.0052	0.37691	1723	13	1752	15.5	1749	18.5	1.48656	1749	18.5
98ADb79a-138	Output_1_18	6717_TRA_Analysis.csv	4.651	0.15	0.3167	0.0073	0.47785	1773	18	1758	13.5	1751	20.5	-1.25642	1751	20.5
98ADb79a-104	Output_1_24	6712_TRA_Analysis.csv	4.793	0.23	0.322	0.0063	0.61477	1799	15.5	1783	20.5	1754	10.5	-2.56556	1754	10.5
98ADb79a-10	Output_1_10	6710_TRA_Analysis.csv	4.414	0.16	0.2994	0.0045	0.59092	1688	11	1714	15	1755	13	3.81766	1755	13
98ADb79a-23	Output_1_23	6710_TRA_Analysis.csv	4.645	0.19	0.3143	0.0045	0.402	1762	11	1760	16.5	1755	16	-0.39886	1755	16
98ADb79a-128	Output_1_8	6717_TRA_Analysis.csv	4.65	0.16	0.313	0.0078	0.79761	1755	19	1757	14	1755	14	0	1755	14
98ADb79a-139	Output_1_19	6717_TRA_Analysis.csv	4.81	0.14	0.3242	0.007	0.7808	1810	17	1786	12	1762	9.5	-2.72418	1762	9.5
98ADb79a-134	Output_1_14	6717_TRA_Analysis.csv	4.889	0.14	0.3215	0.0075	0.43008	1797	18.5	1800	12.5	1770	16	-1.52542	1770	16
98ADb79a-28	Output_1_28	6710_TRA_Analysis.csv	4.65	0.18	0.3135	0.0079	0.65043	1757	19.5	1757	16	1772	15	0.846501	1772	15
98ADb79a-9	Output_1_9	6710_TRA_Analysis.csv	4.522	0.16	0.3003	0.0038	0.67408	1693	9.5	1734	14.5	1773	11	4.51213	1773	11
98ADb79a-19	Output_1_19	6710_TRA_Analysis.csv	4	0.14	0.2673	0.004	0.64736	1527	10	1634	14	1774	9	13.9233	1774	9
98ADb79a-127	Output_1_7	6717_TRA_Analysis.csv	4.872	0.14	0.3268	0.007	0.68875	1823	17	1797	12.5	1775	16	-2.70423	1775	16
98ADb79a-136	Output_1_16	6717_TRA_Analysis.csv	4.781	0.15	0.3168	0.0058	0.099221	1774	14	1781	13	1775	20	0.056338	1775	20
98ADb79a-7	Output_1_7	6710_TRA_Analysis.csv	4.742	0.16	0.3162	0.0037	0.66273	1771	9	1774	14.5	1778	10.5	0.393701	1778	10.5
98ADb79a-6	Output_1_6	6710_TRA_Analysis.csv	4.58	0.18	0.3016	0.0053	0.42727	1699	13	1744	17	1779	18	4.49691	1779	18
98ADb79a-77	Output_1_37	6711_TRA_Analysis.csv	4.46	0.22	0.2967	0.0095	0.70016	1675	23.5	1723	20.5	1781	14	5.95171	1781	14
98ADb79a-110	Output_1_30	6712_TRA_Analysis.csv	4.81	0.24	0.3192	0.0044	0.38836	1786	11	1786	21	1786	18	0	1786	18
98ADb79a-135	Output_1_15	6717_TRA_Analysis.csv	4.91	0.16	0.32	0.0088	0.73552	1789	21.5	1803	14	1788	17	-0.0559284	1788	17
98ADb79a-29	Output_1_29	6710_TRA_Analysis.csv	2.68	0.16	0.1768	0.006	0.90683	1049	16.5	1318	23.5	1790	25	41.3966	1790	25
98ADb79a-39	Output_1_39	6710_TRA_Analysis.csv	4.665	0.17	0.3099	0.006	0.78978	1740	15	1760	15	1790	12.5	2.7933	1790	12.5
98ADb79a-94	Output_1_14	6712_TRA_Analysis.csv	4.721	0.23	0.3114	0.0056	0.46851	1747	14	1771	20.5	1797	14.5	2.78242	1797	14.5
98ADb79a-107	Output_1_27	6712_TRA_Analysis.csv	5.05	0.23	0.3287	0.0055	0.40085	1832	13.5	1827.6	20.5	1820	11	-0.659341	1820	11
98ADb79a-145	Output_1_25	6717_TRA_Analysis.csv	4.98	0.15	0.3231	0.0074	0.32789	1804	18	1815	13.5	1820	20	0.879121	1820	20
98ADb79a-129	Output_1_9	6717_TRA_Analysis.csv	5.245	0.15	0.3342	0.0078	0.63674	1858	19	1860	12.5	1823	14	-1.91991	1823	14
98ADb79a-8	Output_1_8	6710_TRA_Analysis.csv	4.64	0.16	0.3006	0.0046	0.79106	1694	11.5	1756	14.5	1827	9	7.27969	1827	9
98ADb79a-13	Output_1_13	6710_TRA_Analysis.csv	5.11	0.18	0.3316	0.0047	0.61595	1846	11.5	1837	15	1829	12.5	-0.92947	1829	12.5
98ADb79a-2	Output_1_2	6710_TRA_Analysis.csv	4.95	0.2	0.3187	0.0052	0.51582	1783	13	1810	16.5	1834	19	2.78081	1834	19
98ADb79a-5	Output_1_5	6710_TRA_Analysis.csv	5.145	0.18	0.3294	0.0061	0.78899	1835	14.5	1843	15.5	1834	10	-0.0545256	1834	10
98ADb79a-56	Output_1_16	6711_TRA_Analysis.csv	4.721	0.23	0.3056	0.0099	0.67787	1719	24.5	1771	18.5	1834	13.5	6.27045	1834	13.5
98ADb79a-96	Output_1_16	6712_TRA_Analysis.csv	4.35	0.27	0.28	0.011	0.975	1590	28.5	1700	27	1835	9	13.3515	1835	9
98ADb79a-119	Output_1_39	6712_TRA_Analysis.csv	5.24	0.29	0.3364	0.0067	0.36097	1869	16	1864	26.5	1837	29.5	-1.74197	1837	29.5
98ADb79a-34	Output_1_34	6710_TRA_Analysis.csv	3.51	0.15	0.2284	0.0055	0.85864	1326	14.5	1533	15.5	1838	13.5	27.8564	1838	13.5
98ADb79a-106	Output_1_26	6712_TRA_Analysis.csv	5.212	0.25	0.3351	0.0048	0.37471	1863	13.5	1854	21	1838	12	-1.36017	1838	12
98ADb79a-109	Output_1_29	6712_TRA_Analysis.csv	5.154	0.25	0.334	0.0051	0.46135	1857	13	1851	21.5	1841	12.5	-0.869093	1841	12.5
98ADb79a-118	Output_1_38	6712_TRA_Analysis.csv	4.392	0.21	0.2798	0.0085	0.699	1590	21	1710	21	1841	16	13.6339	1841	16
98ADb79a-43	Output_1_3	6711_TRA_Analysis.csv	5.21	0.26	0.3332	0.0096	0.14739	1853	23	1853	19	1842	23	-0.597177	1842	23
98ADb79a-48	Output_1_8	6711_TRA_Analysis.csv	4.92	0.25	0.3192	0.01	0.64808	1785	25	1805	21.5	1844	20.5	3.19957	1844	20.5
98ADb79a-114	Output_1_34	6712_TRA_Analysis.csv	5.195	0.25	0.3258	0.0055	0.68107	1818	14	1851	21.5	1847	14	1.57011	1847	14
98ADb79a-70	Output_1_30	6711_TRA_Analysis.csv	5.23	0.25	0.3394	0.01	0.34637	1884	25	1856	20	1849	19	-1.89292	1849	19
98ADb79a-63	Output_1_23	6711_TRA_Analysis.csv	5.35	0.26	0.3378	0.0097	0.39555	1876	23.5	1876	20.5	1855	22	-1.13208	1855	22
98ADb79a-65	Output_1_25	6711_TRA_Analysis.csv	5.25	0.24	0.3366	0.0093	0.56809	1870	22.5	1860	19.5	1855	11.5	-0.808625	1855	11.5
98ADb79a-37	Output_1_37	6710_TRA_Analysis.csv	5.34	0.2	0.3386	0.0067	0.13258	1880	16	1875	16	1857	24	-1.23856	1857	24
98ADb79a-87	Output_1_7	6712_TRA_Analysis.csv	4.909	0.23	0.317	0.0054	0.63697	1775	13.5	1803	21	1858	10	4.46717	1858	10
98ADb79a-130	Output_1_10	6717_TRA_Analysis.csv	3.72	0.14	0.2325	0.0074	0.8275	1347	19.5	1574	15.5	1860	15.5	27.5806	1860	15.5
98ADb79a-111	Output_1_31	6712_TRA_Analysis.csv	4.964	0.24	0.3148	0.0064	0.85775	1764	16	1813	21.5	1863	10.5	5.31401	1863	10.5
98ADb79a-117	Output_1_37	6712_TRA_Analysis.csv	4.585	0.22	0.2816	0.0049	0.27747	1599	12	1746	21.5	1864	19	14.2167	1864	19
98ADb79a-11	Output_1_11	6710_TRA_Analysis.csv	4.39	0.19	0.2787	0.0068	0.91413	1584	17	1708	17	1866	8	15.1125	1866	8
98ADb79a-15	Output_1_15	6710_TRA_Analysis.csv	5.15	0.2	0.3277	0.0053	0.5264	1827	13	1842	16.5	1866	18	2.09003	1866	18
98ADb79a-156	Output_1_36	6717_TRA_Analysis.csv	5.531	0.15	0.3501	0.0065	0.50226	1935	15.5	1905	12	1866	9.5	-3.69775	1866	9.5
98ADb79a-146	Output_1_26	6717_TRA_Analysis.csv	5.41	0.18	0.3415	0.0088	0.64596	1894	21.5	1889	14	1867	17	-1.44617	1867	17
98ADb79a-95	Output_1_15	6712_TRA_Analysis.csv	4.28	0.21	0.2719	0.0065	0.84483	1550	17	1689	21	1881	12.5	17.597	1881	12.5
98ADb79a-98	Output_1_18	6712_TRA_Analysis.csv	5.32	0.26	0.3309	0.0066	0.75421	1842	16	1871	22	1883	11	2.17738	1883	11
98ADb79a-150	Output_1_30	6717_TRA_Analysis.csv	4.4	0.23	0.2743	0.0093	0.96847	1562	24	1708	23	1909	15	18.1771	1909	15
98ADb79a-80	Output_1_40	6711_TRA_Analysis.csv	5.21	0.27	0.3282	0.01	0.84458	1829	25	1860	22	1912	14.5	4.341	1912	14.5
98ADb79a-79	Output_1_39	6711_TRA_Analysis.csv	3.47	0.18	0.2147	0.0083	0.95383	1253	22	1519	21	1918	9.5	34.6715	1918	9.5
98ADb79a-40	Output_1_40	6710_TRA_Analysis.csv	2.172	0.11	0.1329	0.0047	0.90939	804	13.5	1170	17	1939	15	58.5353	1939	15
98ADb79a-148	Output_1_28	6717_TRA_Analysis.csv	5.884	0.17	0.3505	0.0066	0.60534	1937	16	1958	12.5	1956	12.5	0.97137	1956	12.5
98ADb79a-16	Output_1_16	6710_TRA_Analysis.csv	5.7	0.22	0.3471	0.0066	0.77697	1920	16	1934	18	1967	15	2.38943	1967	15
98ADb79a-67	Output_1_27	6711_TRA_Analysis.csv	5.72	0.28	0.3442	0.011	0.20764	1906	26.5	1933	21	1968	23.5	3.15041	1968	23.5
98ADb79a-66	Output_1_26	6711_TRA_Analysis.csv	4.456	0.21	0.2654	0.0082	0.53777	1517	21	1722	19.5	1972	13	23.073	1972	13
98ADb79a-141	Output_1_21	6717_TRA_Analysis.csv	5.49	0.17	0.3193	0.0074	0.13826	1794	18	1899	13.5	1996	18.5	10.1202	1996	18.5
98ADb79a-24	Output_1_24	6710_TRA_Analysis.csv	6.14	0.23	0.3546	0.0073	0.60911	1956	17.5	1995	16.5	2012	16.5	2.7833	2012	16.5
98ADb79a-69	Output_1_29	6711_TRA_Analysis.csv	6.2	0.29	0.3615	0.011	0.61354	1989	26.5	2005	20.5	2036	12.5	2.30845	2036	12.5
98ADb79a-54	Output_1_14	6711_TRA_Analysis.csv	6.43	0.31	0.3735	0.011	0.21463	2046	27	2035	21	2045	16.5	-0.0488998	2045	16.5
98ADb79a-142	Output_1_22	6717_TRA_Analysis.csv	4.03	0.18	0.23	0.0091	0.83767	1334	23.5	1645	17.5	2051	22	34.9586	2051	22
98ADb79a-152	Output_1_32	6717_TRA_Analysis.csv	6.44	0.19	0.3709	0.0079	0.44443	2033	18.5	2037	13	2053	17	0.974184	2053	17
98ADb79a-83	Output_1_3	6712_TRA_Analysis.csv	6.63	0.33	0.3721	0.0076	0.41355	2039	18.5	2062	22.5	2068	18	1.40232	2068	18
98ADb79a-74	Output_1_34	6711_TRA_Analysis.csv	6.71	0.32	0.3655	0.011	0.50735	2008	25.5	2073	21.5	2117	18.5	5.1488	2117	18.5
98ADb79a-73	Output_1_33	6711_TRA_Analysis.csv	3.441	0.16	0.1836	0.0073	0.30838	1086	20	1513	19	2168	26	49.9077	2168	26
98ADb79a-101	Output_1_21	6712_TRA_Analysis.csv	7.36	0.37	0.3839	0.0078	0.902	2094	19	2155	24	2228	8.5	6.01436	2228	8.5
98ADb79a-4	Output_1_4	6710_TRA_Analysis.csv	6.66	0.23	0.3405	0.0051	0.57969	1889	12.5	2067	15	2231	10	15.3294	2231	10
98ADb79a-120	Output_1_40	6712_TRA_Analysis.csv	5.29	0.28	0.2672	0.0089	0.47167	1526	22.5	1871	23.5	2258	26.5	32.4181	2258	26.5
98ADb79a-137	Output_1_17	6717_TRA_Analysis.csv	7.73	0.25	0.392	0.0092	0.71493	2132	21.5	2199	14.5	2266	16	5.9135	2266	16
98ADb79a-112	Output_1_32	6712_TRA_Analysis.csv	8.57	0.42	0.4231	0.0062	0.65856	2274	14.5	2292	23	2298	13.5	1.04439	2298	13.5
98ADb79a-17	Output_1_17	6710_TRA_Analysis.csv	8.41	0.42	0.4037	0.0089	0.87251	2185	20.5	2272	23	2359	18.5	7.37601	2359	18.5
98ADb79a-25	Output_1_25	6710_TRA_Analysis.csv	8.93	0.34	0.4238	0.0099	0.29983	2277	22.5	2330	17	2402	19	5.204	2402	19
98ADb79a-153	Output_1_33	6717_TRA_Analysis.csv	10.03	0.34	0.4617	0.0099	0.67315	2447	22	2443	17.5	2429	16	-0.741046	2429	16
98ADb79a-72	Output_1_32	6711_TRA_Analysis.csv	9.8	0.44	0.4432	0.013	0.63597	2365	28	2416	21	2443	11.5	3.1928	2443	11.5
98ADb79a-42	Output_1_2	6711_TRA_Analysis.csv	9.8	0.46	0.4491	0.014	0.78837	2391	30.5	2416	21.5	2445	7.5	2.20859	2445	7.5
98ADb79a-140	Output_1_20	6717_TRA_Analysis.csv	7.99	0.34	0.363	0.015	0.93888	1993	36	2227	20	2449	11	18.6198	2449	11
98ADb79a-71	Output_1_31	6711_TRA_Analysis.csv	9.32	0.44	0.4177	0.014	0.89453	2249	32.5	2375	23.5	2459	9	8.54006	2459	9
98ADb79a-113	Output_1_33	6712_TRA_Analysis.csv	10.52	0.51	0.4646	0.0073	0.82003	2459	16.5	2481	23.5	2483	6.5	0.966573	2483	6.5
98ADb79a-126	Output_1_6	6717_TRA_Analysis.csv	10.56	0.33	0.4711	0.011	0.66241	2488	24	2489	15.5	2491	14.5	0.120434	2491	14.5
98ADb79a-84	Output_1_4	6712_TRA_Analysis.csv	9.69	0.46	0.4325	0.008	0.78368	2317	18.5	2406	22.5	2496	12.5	7.17147	2496	12.5
98ADb79a-59	Output_1_19	6711_TRA_Analysis.csv	6.72	0.59	0.296	0.023	0.98531	1660	60	2066	39	2497	7.5	33.5202	2497	7.5
98ADb79a-75	Output_1_35	6711_TRA_Analysis.csv	5.52	0.32	0.2441	0.011	0.92164	1407	27.5	1901	25	2498	16	43.6749	2498	16
98ADb79a-21	Output_1_21	6710_TRA_Analysis.csv	10.8	0.84	0.462	0.024	0.41899	2440	50	2494	37	2520	55	3.1746	2520	55
98ADb79a-31	Output_1_31	6710_TRA_Analysis.csv	10.49	0.41	0.4589	0.0074	0.83404	2434	16.5	2478	18.5	2527	10.5	3.68025	2527	10.5
98ADb79a-18	Output_1_18	6710_TRA_Analysis.csv	10.85	0.43	0.467	0.013	0.93542	2468	29	2509	19.5	2537	8	2.71975	2537	8
98ADb79a-124	Output_1_4	6717_TRA_Analysis.csv	10.26	0.51	0.448	0.016	0.93894	2383	36	2454	22.5	2543	15	6.29178	2543	15
98ADb79a-41	Output_1_1	6711_TRA_Analysis.csv	7.69	0.42	0.331	0.014	0.95525	1840	34.5	2201	24.5	2547	12.5	27.7581	2547	12.5
98ADb79a-125	Output_1_5	6717_TRA_Analysis.csv	10.92	0.34	0.4753	0.011	0.92823	2506	24.5	2515	14.5	2550	11.5	1.72549	2550	11.5
98ADb79a-61	Output_1_21	6711_TRA_Analysis.csv	7.32	0.44	0.31	0.012	0.95212	1740	28.5	2146	27	2554	12	31.8716	2554	12
98ADb79a-123	Output_1_3	6717_TRA_Analysis.csv	11.39	0.33	0.4911	0.01	0.6367	2575	22	2555	13.5	2560	10	-0.585938	2560	10
98ADb79a-143	Output_1_23	6717_TRA_Analysis.csv	11.48	0.43	0.481	0.012	0.67657	2530	27	2568	19.5	2563	22	1.28755	2563	22
98ADb79a-35	Output_1_35	6710_TRA_Analysis.csv	11.42	0.41	0.4913	0.0085	0.66646	2576	18.5	2557	17	2564	11	-0.468019	2564	11
98ADb79a-44	Output_1_4	6711_TRA_Analysis.csv	10.95	0.51	0.4649	0.014	0.80358	2461	30.5	2519	21.5	2568	7	4.16667	2568	7
98ADb79a-58	Output_1_18	6711_TRA_Analysis.csv	11.54	0.52	0.4905	0.014	0.68609	2573	31	2567.3	21.5	2568	9.5	-0.194704	2568	9.5
98ADb79a-116	Output_1_36	6712_TRA_Analysis.csv	11.86	0.57	0.489	0.013	0.82412	2567	27	2593	23.5	2570	8.5	0.116732	2570	8.5
98ADb79a-53	Output_1_13	6711_TRA_Analysis.csv	9.55	0.6	0.406	0.019	0.94706	2197	43	2390	29	2573	10.5	14.6133	2573	10.5
98ADb79a-155	Output_1_35	6717_TRA_Analysis.csv	11.94	0.38	0.5075	0.0098	0.63448	2646	21	2603	14	2573	13.5	-2.83716	2573	13.5
98ADb79a-26	Output_1_26	6710_TRA_Analysis.csv	11.54	0.41	0.4873	0.009	0.72299	2558	19.5	2568	16.5	2579	9	0.814269	2579	9
98ADb79a-82	Output_1_2	6712_TRA_Analysis.csv	10.09	0.52	0.4298	0.0092	0.77873	2304	21.5	2441	25	2580	14.5	10.6977	2580	14.5
98ADb79a-159	Output_1_39	6717_TRA_Analysis.csv	12.07	0.34	0.5016	0.0095	0.52768	2621	20.5	2610	13	2580	12.5	-1.58915	2580	12.5
98ADb79a-160	Output_1_40	6717_TRA_Analysis.csv	11.76	0.41	0.497	0.014	0.58918	2598	30	2589	15.5	2582	15.5	-0.619675	2582	15.5
98ADb79a-51	Output_1_11	6711_TRA_Analysis.csv	11.23	0.52	0.4783	0.014	0.5838	2520	30.5	2542	21.5	2584	7.5	2.47678	2584	7.5
98ADb79a-102	Output_1_22	6712_TRA_Analysis.csv	11.66	0.56	0.4919	0.0075	0.4184	2578	16.5	2577	25	2585	11	0.270793	2585	11
98ADb79a-1	Output_1_1	6710_TRA_Analysis.csv	11.45	0.42	0.4786	0.0083	0.84827	2521	18	2560	17	2587	9	2.55122	2587	9
98ADb79a-88	Output_1_8	6712_TRA_Analysis.csv	11.92	0.62	0.501	0.01	0.85715	2618	22.5	2596	25	2587	8.5	-1.1983	2587	8.5
98ADb79a-115	Output_1_35	6712_TRA_Analysis.csv	11.64	0.55	0.483	0.01	0.72333	2550	21	2576	23	2588	10	1.46832	2588	10
98ADb79a-55	Output_1_15	6711_TRA_Analysis.csv	10.41	0.5	0.4412	0.014	0.83823	2355	31	2470	22	2590	9.5	9.07336	2590	9.5
98ADb79a-93	Output_1_13	6712_TRA_Analysis.csv	10.92	0.64	0.46	0.016	0.9544	2437	38.5	2513	30	2590	12	5.90734	2590	12
98ADb79a-27	Output_1_27	6710_TRA_Analysis.csv	11.8	0.41	0.4908	0.0057	0.63158	2574	12.5	2588	16	2593	11	0.732742	2593	11
98ADb79a-89	Output_1_9	6712_TRA_Analysis.csv	11.67	0.54	0.4937	0.0059	0.60824	2592	14.5	2578.2	22.5	2593	6	0.0385654	2593	6
98ADb79a-103	Output_1_23	6712_TRA_Analysis.csv	11.99	0.57	0.5044	0.0081	0.59301	2640	18	2603	24.5	2593	10.5	-1.81257	2593	10.5
98ADb79a-60	Output_1_20	6711_TRA_Analysis.csv	11.07	0.57	0.4633	0.017	0.86893	2464	38	2528	22.5	2599	8.5	5.19431	2599	8.5
98ADb79a-105	Output_1_25	6712_TRA_Analysis.csv	11.39	0.63	0.473	0.014	0.88767	2495	31	2553	27.5	2602	12	4.11222	2602	12
98ADb79a-46	Output_1_6	6711_TRA_Analysis.csv	10.91	0.61	0.456	0.019	0.96407	2419	41.5	2514	26.5	2603	8	7.06877	2603	8
98ADb79a-78	Output_1_38	6711_TRA_Analysis.csv	11.1	0.51	0.4655	0.013	0.52119	2464	28	2531.7	21.5	2603	9.5	5.33999	2603	9.5
98ADb79a-133	Output_1_13	6717_TRA_Analysis.csv	9.75	0.37	0.396	0.012	0.83701	2151	28	2410	17.5	2606	11.5	17.4597	2606	11.5
98ADb79a-131	Output_1_11	6717_TRA_Analysis.csv	12.22	0.34	0.5012	0.011	0.75955	2618	23.5	2621	13	2609	10	-0.34496	2609	10
98ADb79a-122	Output_1_2	6717_TRA_Analysis.csv	12.15	0.49	0.516	0.018	0.58906	2680	37.5	2614	19	2616	31	-2.44648	2616	31
98ADb79a-92	Output_1_12	6712_TRA_Analysis.csv	12.21	0.59	0.5044	0.0071	0.74584	2632	16	2620	23.5	2619	8.5	-0.496373	2619	8.5
98ADb79a-157	Output_1_37	6717_TRA_Analysis.csv	7.2	0.34	0.294	0.011	0.97576	1658	27.5	2133	21.5	2619	11	36.6934	2619	11
98ADb79a-22	Output_1_22	6710_TRA_Analysis.csv	11.29	0.4	0.4649	0.0083	0.64614	2461	18.5	2547	16.5	2620	10.5	6.0687	2620	10.5
98ADb79a-62	Output_1_22	6711_TRA_Analysis.csv	8.91	0.41	0.3606	0.013	0.40927	1984	30.5	2329	21	2622	9.5	24.3326	2622	9.5
98ADb79a-108	Output_1_28	6712_TRA_Analysis.csv	10.74	0.62	0.444	0.015	0.94191	2368	34.5	2505	27	2626	11.5	9.82483	2626	11.5
98ADb79a-81	Output_1_1	6712_TRA_Analysis.csv	12.06	0.59	0.4913	0.0091	0.5394	2576	20	2609	23.5	2634	11	2.20197	2634	11
98ADb79a-151	Output_1_31	6717_TRA_Analysis.csv	12.56	0.46	0.506	0.015	0.83034	2640	32.5	2646	17.5	2648	15	0.302115	2648	15
98ADb79a-32	Output_1_32	6710_TRA_Analysis.csv	12.54	0.46	0.5013	0.0077	0.41148	2619	16.5	2645	17.5	2659	16.5	1.50432	2659	16.5
98ADb79a-90	Output_1_10	6712_TRA_Analysis.csv	12.65	0.61	0.5111	0.0085	0.61382	2661	19	2653	23.5	2659	11	-0.0752162	2659	11
98ADb79a-158	Output_1_38	6717_TRA_Analysis.csv	13.05	0.37	0.523	0.0096	0.46784	2712	20.5	2683	13.5	2665	13	-1.7636	2665	13
98ADb79a-147	Output_1_27	6717_TRA_Analysis.csv	13.14	0.47	0.514	0.013	0.63573	2672	27	2688	17	2667	18	-0.187477	2667	18
98ADb79a-45	Output_1_5	6711_TRA_Analysis.csv	12.77	0.62	0.5053	0.014	0.54303	2636	30.5	2661	24	2669	11.5	1.23642	2669	11.5
98ADb79a-20	Output_1_20	6710_TRA_Analysis.csv	11.98	0.45	0.477	0.011	0.82731	2525	25	2602	18	2670	11	5.43071	2670	11
98ADb79a-154	Output_1_34	6717_TRA_Analysis.csv	13.26	0.41	0.531	0.014	0.74586	2743	28.5	2698	14.5	2670	12	-2.73408	2670	12
98ADb79a-144	Output_1_24	6717_TRA_Analysis.csv	13.02	0.37	0.507	0.011	0.75102	2643	23	2680	14	2672	12	1.08533	2672	12
98ADb79a-132	Output_1_12	6717_TRA_Analysis.csv	12.04	0.4	0.4705	0.012	0.82848	2485	26	2606	15.5	2674	13.5	7.06806	2674	13.5
98ADb79a-85	Output_1_5	6712_TRA_Analysis.csv	12.98	0.62	0.5207	0.0094	0.9013	2702	21	2678	23.5	2683	7	-0.708163	2683	7
98ADb79a-12	Output_1_12	6710_TRA_Analysis.csv	12.83	0.48	0.5077	0.0083	0.81324	2646	17.5	2667	17.5	2687	8	1.52587	2687	8
98ADb79a-97	Output_1_17	6712_TRA_Analysis.csv	13.13	0.63	0.5193	0.0084	0.49097	2696	18	2689	23.5	2690	10	-0.223048	2690	10
98ADb79a-99	Output_1_19	6712_TRA_Analysis.csv	10.66	0.5	0.4207	0.0067	0.52169	2263	15.5	2494	23	2691	9.5	15.9049	2691	9.5
98ADb79a-49	Output_1_9	6711_TRA_Analysis.csv	11.29	0.54	0.4496	0.015	0.81727	2392	32.5	2546	23.5	2697	11	11.3089	2697	11
98ADb79a-50	Output_1_10	6711_TRA_Analysis.csv	12.79	0.58	0.5046	0.014	0.79849	2633	30.5	2667	21.5	2699	6	2.44535	2699	6
98ADb79a-52	Output_1_12	6711_TRA_Analysis.csv	12.7	0.64	0.5065	0.016	0.51719	2641	33.5	2656	23	2714	15.5	2.68976	2714	15.5
98ADb79a-91	Output_1_11	6712_TRA_Analysis.csv	13.49	0.7	0.527	0.012	0.74682	2728	27	2719	27.5	2734	15	0.219459	2734	15
98ADb79a-38	Output_1_38	6710_TRA_Analysis.csv	13.78	0.48	0.5262	0.0086	0.71604	2725	18.5	2735	16	2736	10	0.402047	2736	10
98ADb79a-47	Output_1_7	6711_TRA_Analysis.csv	13.61	0.61	0.5215	0.015	0.53593	2705	31	2723	18	2744	9	1.42128	2744	9
98ADb79a-36	Output_1_36	6710_TRA_Analysis.csv	15.2	0.57	0.5518	0.0093	0.62029	2832	19.5	2827	17.5	2816	12.5	-0.568182	2816	12.5
98ADb79a-68	Output_1_28	6711_TRA_Analysis.csv	14.89	0.69	0.5446	0.017	0.3555	2802	34.5	2807	22.5	2817	13	0.532481	2817	13
98ADb79a-33	Output_1_33	6710_TRA_Analysis.csv	12.22	0.59	0.405	0.014	0.96888	2192	31.5	2618	23	2970	7.5	26.1953	2970	7.5
98ADb79a-100	Output_1_20	6712_TRA_Analysis.csv	4.5	0.23	0.154	0.0042	0.71518	923	12	1730	22.5	2971	12	68.933	2971	12
98ADb79a-121	Output_1_1	6717_TRA_Analysis.csv	22.62	0.71	0.671	0.015	0.72635	3310	28.5	3210	15	3182	12.5	-4.02263	3182	12.5
Analyses made at the U.S. Geological Survey, Denver, Colorado, USA.
Analyses in gray are >10% discordant and are not included in probability density plots. None of the analyses that meet %DISCORDANT criteria have greater than 10% uncertainty.
2-sig abs (propagated)- isotope ratio errors are absolute 2-sigma errors propagated to include instrumental errors and standard analysis errors.
1-sig (abs)-age errors are 1-sigma absolute errors.
%DISCORDANT- Calculated with 206Pb/238U age relative to 207Pb/206Pb age.
BEST AGE-Ages <1300 Ma are shown as 206Pb/238U Age. Ages >1300 Ma are shown as 207Pb/206Pb age.

## Sheet: Table DR6
Dusel-Bacon, C., Holm-Denoma, C.S., Jones, J.V., III, Aleinikoff, J.N., and Mortensen, J.K., 2017, Detrital zircon geochronology of quartzose metasedimentary rocks from parautochthonous North America, east-central Alaska: Lithosphere, doi:10.1130/L672.1.
GSA Data Repository Item 2017332
GSA Data Repository Table DR6 U-Pb detrital zircon ages for all metasedimentary rocks from this study that are used in probability density plots (Figs. 7 and 9 of Dusel-Bacon et al., in review).
For ages > 1300 Ma, the 207Pb/206Pb age is given, and for the small subset of ages < 1300 Ma, the 206Pb/238U age is given. All ages are <10% discordant. Age uncertainties are 1 sigma.
05ADb34	±	05ADb35	±	05ADb36	±	04ADb01B	±	03ADb14 LA-ICP-MS	±	03ADb14 SHRIMP	±	98ADb79A	±	96ADb25A	±	97ADb43A	±
890.3	4.56	1330	36.46	1322.5	30.98	1436	31	787.2	7.84	1680	21	771	13.5	1143	7	1499	31
896.7	10.57	1650.4	14.9	1367.9	28.82	1685	39	1081.2	5.32	1734	25	792	11.5	1432	11	1695	9.5
926.2	7.28	1763.7	18.6	1443.7	23.04	1753	22	1744.7	19.29	1752	26	1705	23.5	1734	19	1702	17
947.8	4.02	1801.9	10.48	1451.2	20.89	1753	18	1745.1	22.02	1760	17	1739	16.5	1736	7	1731	24.5
994.9	8.64	1808.7	11.81	1722.4	23.56	1770	20	1751.2	19.39	1761	20	1744	14	1745	24.5	1743	12
996	8.74	1812.3	28.17	1787	46.39	1794	27	1751.7	23.03	1766	27	1749	18.5	1745	12.5	1748	12.5
1008	4.31	1814.4	12.69	1792.9	45.22	1817	26	1753.8	19.66	1773	32	1751	20	1750	11.5	1759	9
1013.4	4.72	1814.4	17.01	1805.8	24.45	1833	34	1754.5	24.99	1777	14	1754	10.5	1752	16	1765	20
1043.8	5.18	1819.9	10.7	1808.2	36.53	1842	17	1758.8	15.98	1778	22	1755	13	1756	17.5	1772	20
1052.5	6.2	1824.4	13.8	1821.4	26.23	1842	21	1758.8	16.82	1789	16	1755	16	1760	9	1774	12
1076.7	5.39	1824.7	9.39	1827	33.48	1844	34	1769.8	15.22	1792	44	1755	13	1763	12	1775	18
1079.3	5.1	1826.3	12.82	1835	32.6	1859	28	1769.9	14.79	1800	18	1762	7.5	1772	18.5	1777	11.5
1082.3	5.15	1832	12.82	1836.5	24.86	1866	34	1772.1	14.26	1827	15	1770	15	1777	16	1777	10.5
1151.4	7.98	1832.5	12.37	1836.7	18.03	1878	32	1780.8	33.72	1834	38	1772	15	1778	25.5	1779	9
1166.1	4.51	1835.4	16.97	1846.5	21.62	1879	18	1787.1	29.83	1835	18	1773	11	1778	20.5	1782	13.5
1172.8	7.7	1836.5	15.25	1853.2	30.82	1882	35	1788	44.1	1836	23	1775	15	1782	17	1787	14.5
1181.4	10.18	1837.5	8.81	1860.9	31.99	1889	27	1794.6	12.62	1841	36	1775	19.5	1785	16.5	1791	12
1211.7	12.27	1838	11.14	1861.6	23.61	1889	21	1797.8	16.98	1853	14	1778	10.5	1786	25	1796	9
1227.2	7.74	1838.3	14.54	1873.6	24.11	1897	33	1806.8	16.73	1868	28	1779	18	1787	20	1797	12.5
1241.3	7.77	1838.4	26.91	1878.8	20.25	1906	28	1813.7	67.84	1870	34	1781	14	1789	22.5	1798	16.5
1260.4	8.23	1840.1	8.89	1879.8	19.49	1916	33	1827.8	28.29	1882	27	1786	18	1790	13.5	1798	11
1297	7.79	1843	19.92	1887.9	19.08	1934	30	1837.7	33.23	1887	20	1788	16	1801	10	1802	12.5
1309.3	31.75	1847.2	14.07	1889.2	21.76	1972	17	1839.2	18.07	1892	26	1790	12.5	1811	8.5	1805	18
1356.7	21.77	1848	10.06	1897	20.14	1976	15	1839.6	32.54	1961	25	1797	14.5	1813	32.5	1807	16
1420.6	15.96	1854	12.04	1904.4	16.59	1986	14	1839.9	15.43	1969	20	1820	11	1813	16	1808	15.5
1438.4	18.35	1856.2	10.46	1911.5	50.64	1994	16	1844.7	17.67	1979	19	1820	19.5	1815	18.5	1809	14.5
1478.5	29.09	1859.3	9.69	1920.8	18.44	2009	15	1854.3	17.6	2097	19	1823	13	1820	11	1812	21
1505.5	27.49	1859.4	23.29	1945.4	23.22	2015	16	1859.9	16.29	2186	14	1827	9	1821	24.5	1816	7
1529.7	35.28	1859.7	12.56	1971.2	17.59	2024	34	1865.4	23.07	2291	9	1829	12.5	1823	15	1821	14
1592.8	16.14	1865.7	9.5	1973.3	18.96	2081	19	1865.7	15.94	2310	14	1834	19	1829	16.5	1827	16
1781.8	29.86	1870.5	13.43	1978.1	48.99	2195	17	1870.4	17.76	2310	11	1834	10	1831	14	1831	21.5
1799.9	32.15	1879.9	12.78	1979.3	38.37	2251	31	1873.8	37.44	2312	15	1834	13.5	1831	21.5	1833	21
1811.9	16.86	1879.9	12.98	1984.6	31.04	2301	20	1875.5	26.75	2333	12	1835	9	1832	20.5	1835	12
1828.8	19.48	1881.9	11.71	1987.7	39.63	2309	14	1876.7	30.19	2402	14	1837	29.5	1838	19	1840	14
1841.8	19.31	1907.4	13.49	1997.3	25.17	2319	43	1877.1	20.73	2574	13	1838	12	1847	16.5	1848	16.5
1853.5	24.93	1908.5	10.33	2003.2	28.01	2328	11	1877.3	24.11	2601	17	1841	12.5	1849	21	1850	16
1867.6	22.64	1917	18.28	2101.7	32.37	2441	21	1877.6	21.26	2605	17	1842	23	1850	18	1852	19
1878	31.8	1917.1	10.7	2102.5	22.72	2472	11	1883.6	24.31	2625	10	1844	20.5	1851	23	1852	19.5
1912.2	29.74	1939.5	13.11	2103.1	41.85	2503	13	1889.7	21.14	2632	34	1847	14	1853	18.5	1856	16
1914	31.45	1942.6	28.44	2110.2	65.06	2509	13	1891.1	19.56	2633	12	1849	19	1853	14.5	1864	17.5
1929.3	15.5	1943.5	20.89	2224.9	32.49	2566	18	1891.3	26.6	2643	14	1855	22	1854	14.5	1891	13
1972.4	17.31	1953.5	21.37	2464.1	22.2	2598	13	1916.7	41.26	2644	5	1855	11.5	1860	16	1892	32
1987.6	37.36	1971.7	10.08	2548.7	19.76	2700	12	1924.2	17.99	2644	16	1857	24	1864	14	1898	20
2387	15.78	1982.3	10.72	2607.9	24.29	2728	17	1934.6	12.5	2662	12	1858	10	1864	24.5	1913	14.5
2415.5	18.15	2004.2	14.78	2638.9	27.15	2735	10	1950.2	15.98	2670	20	1863	10.5	1867	17	1937	7
2529.4	17.73	2052.7	9.86	2664.6	17.53	2824	19	1957.4	15.96	2683	15	1866	18	1868	31.5	2065	14
2557.5	31.53	2238.2	18.51	2667.2	14.99	2900	15	1969.1	15.41	2757	16	1866	8	1871	25.5	2098	16
2586.2	10.77	2317.3	11.16	2672	17.27	3622	32	1970.6	15.2	2776	14	1867	16	1872	17.5	2291	10.5
2618.9	17.28	2325.7	7.69	2681	21.83			1996.2	18.16			1883	11	1873	23	2469	11.5
2625.8	12.58	2326.2	10.08	2682	18.52			2280.9	16.51			1912	14.5	1873	15.5	2480	14
2643	30.72	2335.5	18.89	2698	18.06			2283	13.32			1956	11	1874	20	2523	35
2685.9	25.02	2336.8	9.87	2709.7	36.17			2456.7	15.25			1967	15	1889	16	2553	8.5
2685.9	10.54	2354.7	14.56	2714.1	13.78			2520.6	23.88			1968	23.5	1895	23	2554	10.5
2703.6	13.39	2376.2	9.64	2725.6	25.83			2537.6	14.16			1996	18	1902	20	2571	13.5
2711.1	24.44	2382.3	10.15	2739	15.24			2563.6	16.51			2012	16.5	1920	9.5	2578	10.5
		2401	14.62	2747	20.06			2564.1	16.78			2036	12.5	1927	8	2597	12.5
		2402.7	18.1	2819.6	19.66			2575.3	15.89			2045	16.5	1935	21	2609	8
		2433.5	11.86	2852.6	27.48			2627	31.56			2053	16	1939	33	2609	8
		2516.8	26.49	2858.3	14.13			2649.4	12.49			2068	18	1939	11.5	2610	8
		2586.1	12.68					2658.8	11.33			2117	18.5	1942	20.5	2611	10.5
		2634.6	9.91					2682.4	41.73			2228	8.5	1943	15	2611	14
		2639	13.81					2724.4	34.53			2266	15.5	1966	24.5	2612	9
		2649.4	10.35					2830.5	15.29			2298	13.5	1972	42.5	2619	11
		2660.2	17.43									2359	18.5	2039	19.5	2627	9.5
		2664.9	11.21									2402	19	2057	17	2634	10
		2671	8.71									2429	15.5	2062	21.5	2665	8.5
		2672.7	8.43									2443	11.5	2087	17	2671	6
		2677.4	6.86									2445	7.5	2105	15	2672	13.5
		2678.5	8.57									2459	9	2127	19	2675	15.5
		2679.1	18.38									2483	6.5	2321	16.5	2675	12.5
		2681.8	13.14									2491	13.5	2434	12.5	2676	9
		2682.1	8.09									2496	12.5	2464	15.5	2678	6.5
		2688.4	19.67									2520	55	2509	11.5	2678	13.5
		2695.1	13.95									2527	10.5	2566	8.5	2684	14
		2697	14.02									2537	8	2571	9.5	2691	11
		2697.7	9.3									2543	14.5	2580	10.5	2694	12.5
		2700.9	12.17									2550	10	2581	8	2700	8
		2707.8	7.51									2560	8.5	2583	8	2702	21.5
		2709.5	11.99									2563	21.5	2586	20.5	2720	14
		2715.4	11.6									2564	11	2586	10.5	2723	13
		2719.8	13.59									2568	7	2592	18.5	2727	12.5
		2720.9	20.04									2568	9.5	2594	14.5	2744	13
		2741.5	12.76									2570	8.5	2598	9.5	2967	10.5
		2743.6	12.76									2573	12.5	2607	11
		2744.8	10.99									2579	9	2612	11.5
		2812.2	9.1									2580	11.5	2617	10
		2847.1	14.52									2582	15	2628	13.5
		2920.5	17									2584	7.5	2643	9.5
		3678.3	10.04									2585	11	2673	20
												2587	9	2675	17.5
												2587	8.5	2681	10
												2588	10	2685	17
												2590	9.5	2702	13.5
												2590	12	2707	9
												2593	11	2719	19.5
												2593	6	2751	18.5
												2593	10.5	2753	14.5
												2599	8.5	2817	23.5
												2602	12	2831	20
												2603	8	2920	9.5
												2603	9.5	3261	7.5
												2609	8.5
												2616	30.5
												2619	8.5
												2620	10.5
												2626	11.5
												2634	11
												2648	14.5
												2659	16.5
												2659	11
												2665	12
												2667	17.5
												2669	11.5
												2670	11
												2670	11
												2672	11
												2674	12.5
												2683	7
												2687	8
												2690	10
												2699	6
												2714	15.5
												2734	15
												2736	10
												2744	9
												2816	12.5
												2817	13
												3182	11.5
